# Supplementary material for: Coverage of antenatal, intrapartum, and newborn care in 104 districts of Ethiopia: A before and after study four years after the launch of the national Community-Based Newborn Care programme
Source: PLOS journal article supplement (doi:10.1371/journal.pone.0251706), 2021-08-05
Supplement: S1 (10.1371/journal.pone.0251706.s001) [file journal.pone.0251706.s001]

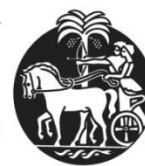

**COMMUNITY BASED NEWBORN CARE IN ETHIOPIA**

**HOUSEHOLD SURVEY QUESTIONNAIRE V 2.1**

**Module 1**

| SECTION 1: Household Identifiers and Characteristics |                                                                                   |                                              |
|------------------------------------------------------|-----------------------------------------------------------------------------------|----------------------------------------------|
| 100                                                  | Date (dd/mm/yyyy)                                                                 | _ _ _  /  _ _ _  /  _ _ _ _ _                |
| 101                                                  | Region                                                                            | _ _ _ _ _ _ _ _ _ _ _ _ _ _ _ _ _            |
| 102                                                  | Zone                                                                              | _ _ _ _ _ _ _ _ _ _ _ _ _ _ _ _ _            |
| 103                                                  | Woreda name                                                                       | _ _ _ _ _ _ _ _ _ _ _ _ _ _ _ _ _            |
| 104                                                  | PHCU/Health Center name                                                           | _ _ _ _ _ _ _ _ _ _ _ _ _ _ _ _ _            |
| 105                                                  | Kebele name                                                                       | _ _ _ _ _ _ _ _ _ _ _ _ _ _ _ _ _            |
| 106                                                  | Gote name                                                                         | _ _ _ _ _ _ _ _ _ _ _ _ _ _ _ _ _            |
| 107                                                  | PHCU Cluster Number<br><i>Enter the cluster number</i>                            | _ _ _ _                                      |
| 108                                                  | Household number<br><i>Enter the household number</i>                             | _ _ _                                        |
| 109                                                  | Unique household ID<br><i>To be copied onto all documents, e.g. consent forms</i> | _ _ _ _  /  _ _ _ _ <br>cluster household    |
| 110                                                  | GPS Latitude                                                                      | _ _  :  _ _ _ _ _                            |
| 111                                                  | GPS Longitude                                                                     | _ _  :  _ _ _ _ _                            |
| 112                                                  | Name of household head                                                            | _ _ _ _ _ _ _ _ _ _ _ _ _ _ _ _ _            |
| 113                                                  | Date of first visit                                                               | Day  _ _ _  Month  _ _ _  Year  _ _ _ _ _    |
| 114                                                  | Interviewer's name                                                                | Name _____                                   |
| 115                                                  | <i>Interviewer: Have you read him/her the consent form?</i>                       | <div>1 = Yes<br/>2 = No</div> <div> _ </div> |

|     |                                                 |                                                                                                                                                                                                                                                                                                             |     |
|-----|-------------------------------------------------|-------------------------------------------------------------------------------------------------------------------------------------------------------------------------------------------------------------------------------------------------------------------------------------------------------------|-----|
| 116 | <b>Interviewer: Does the respondent agree?</b>  | 1 = Yes<br>2 = No- <b>end the interview here and move on to the next household.</b>                                                                                                                                                                                                                         | _   |
| 117 | What is the ethnic group of the household head? | 1 = Agew<br>2 = Amhara<br>3 = Bench<br>4 = Burji<br>5 = Dizi<br>6 = Gedeo<br>7 = Gurage<br>8 = Hadiya<br>9 = Keficho<br>10= Kembata<br>11= Konta<br>12 = Me'enite<br>13 = Oromo<br>14 = Silite<br>15 = Tigray<br>16=Welayita<br>17 = Other Ethiopian National Groups<br>18 = From two or more ethnic groups | _ _ |

| Visits                                                                                                                                                                                  |                          | 1 <sup>st</sup>            | 2 <sup>nd</sup>            | 3 <sup>rd</sup>            | Final Visit                                           |
|-----------------------------------------------------------------------------------------------------------------------------------------------------------------------------------------|--------------------------|----------------------------|----------------------------|----------------------------|-------------------------------------------------------|
| Date (dd/mm/yyyy)                                                                                                                                                                       |                          | _ _  /  _ _ <br>/  _ _ _ _ | _ _  /  _ _ <br>/  _ _ _ _ | _ _  /  _ _ <br>/  _ _ _ _ | Day  _ _ <br>Month  _ _ <br>Year  _ _ _ <br>Result  _ |
| <b>Interviewer's name</b>                                                                                                                                                               |                          |                            |                            |                            |                                                       |
| <b>Result (Enter relevant code below)</b>                                                                                                                                               |                          | _                          | _                          | _                          |                                                       |
| <b>If not completed during this interview, when is the next visit (appointment)</b>                                                                                                     | <b>Date</b> (dd/mm/yyyy) |                            | _ _  /  _ _ <br>/  _ _ _ _ | _ _  /  _ _ <br>/  _ _ _ _ |                                                       |
|                                                                                                                                                                                         | <b>Time</b>              |                            |                            |                            |                                                       |
| <b>Result Codes:</b><br><b>1. Completed</b><br><b>2. Partly completed</b><br><b>3. Postponed</b><br><b>4. Not at home</b><br><b>5. No-one competent to respond</b><br><b>6. Refused</b> |                          |                            |                            |                            |                                                       |

**If refused end interview.**

| 118              | <b>Household Listing</b><br><i>Now I would like to ask you about people who are residents of this house. By resident, I mean everyone who has been present for the last 3 months and who normally eat together.</i><br><b>Start with head of the household and older people, then children from oldest to youngest.</b> |                        |                                                                                                         |                                                                              |                                        |                                                                                                                   |                                                     |                                                                                                 |
|------------------|-------------------------------------------------------------------------------------------------------------------------------------------------------------------------------------------------------------------------------------------------------------------------------------------------------------------------|------------------------|---------------------------------------------------------------------------------------------------------|------------------------------------------------------------------------------|----------------------------------------|-------------------------------------------------------------------------------------------------------------------|-----------------------------------------------------|-------------------------------------------------------------------------------------------------|
| Person<br>Number | Person<br>Name                                                                                                                                                                                                                                                                                                          | Sex                    | Date of birth                                                                                           | Age                                                                          | Eligible?<br>(woman<br>aged 13-<br>49) | Marital status                                                                                                    | Formal<br>years of<br>education<br>completed        | Religion                                                                                        |
|                  | Enter First Name (If identical names in the same household use the initial of the last name)                                                                                                                                                                                                                            | 1 = Male<br>2 = Female | (dd/mm/yyyy)<br>Enter 99 if don't know dd<br>Enter 99 if don't know mm<br>Enter 9999 if don't know yyyy | Enter age in completed years<br><br>If person is less than one year, enter 0 | 1 = Yes<br>2 = No                      | 1 = Currently married<br>2 = In a union<br>3 = Never married<br>4 = Divorced<br>5 = Widowed<br>6 = Not Applicable | Enter number of formal years of education completed | 1 = Orthodox<br>2 = Catholic<br>3 = Protestant<br>4 = Muslim<br>5 = Other<br>6 = Not Applicable |
| 1                | _ _ _ _ _ _ _ _ _ _ _ _ _ _ _                                                                                                                                                                                                                                                                                           | _                      | _ _ / _ _ / _ _ _ _ _                                                                                   | _ _                                                                          | _                                      | _                                                                                                                 | _ _                                                 | _                                                                                               |
| 2                | _ _ _ _ _ _ _ _ _ _ _ _ _ _ _                                                                                                                                                                                                                                                                                           | _                      | _ _ / _ _ / _ _ _ _ _                                                                                   | _ _                                                                          | _                                      | _                                                                                                                 | _ _                                                 | _                                                                                               |
| 3                | _ _ _ _ _ _ _ _ _ _ _ _ _ _ _                                                                                                                                                                                                                                                                                           | _                      | _ _ / _ _ / _ _ _ _ _                                                                                   | _ _                                                                          | _                                      | _                                                                                                                 | _ _                                                 | _                                                                                               |
| 4                | _ _ _ _ _ _ _ _ _ _ _ _ _ _ _                                                                                                                                                                                                                                                                                           | _                      | _ _ / _ _ / _ _ _ _ _                                                                                   | _ _                                                                          | _                                      | _                                                                                                                 | _ _                                                 | _                                                                                               |
| 5                | _ _ _ _ _ _ _ _ _ _ _ _ _ _ _                                                                                                                                                                                                                                                                                           | _                      | _ _ / _ _ / _ _ _ _ _                                                                                   | _ _                                                                          | _                                      | _                                                                                                                 | _ _                                                 | _                                                                                               |
| 6                | _ _ _ _ _ _ _ _ _ _ _ _ _ _ _                                                                                                                                                                                                                                                                                           | _                      | _ _ / _ _ / _ _ _ _ _                                                                                   | _ _                                                                          | _                                      | _                                                                                                                 | _ _                                                 | _                                                                                               |
| 7                | _ _ _ _ _ _ _ _ _ _ _ _ _ _ _                                                                                                                                                                                                                                                                                           | _                      | _ _ / _ _ / _ _ _ _ _                                                                                   | _ _                                                                          | _                                      | _                                                                                                                 | _ _                                                 | _                                                                                               |
| 8                | _ _ _ _ _ _ _ _ _ _ _ _ _ _ _                                                                                                                                                                                                                                                                                           | _                      | _ _ / _ _ / _ _ _ _ _                                                                                   | _ _                                                                          | _                                      | _                                                                                                                 | _ _                                                 | _                                                                                               |
| 9                | _ _ _ _ _ _ _ _ _ _ _ _ _ _ _                                                                                                                                                                                                                                                                                           | _                      | _ _ / _ _ / _ _ _ _ _                                                                                   | _ _                                                                          | _                                      | _                                                                                                                 | _ _                                                 | _                                                                                               |
| 10               | _ _ _ _ _ _ _ _ _ _ _ _ _ _ _                                                                                                                                                                                                                                                                                           | _                      | _ _ / _ _ / _ _ _ _ _                                                                                   | _ _                                                                          | _                                      | _                                                                                                                 | _ _                                                 | _                                                                                               |

**Now I want to ask you some questions about the characteristics of your household**

**Interviewer: In this section and throughout the questionnaire, please read out all the options to the interviewee UNLESS it is clearly stated 'Do not read list'.**

|     |                                                                                              |                                                                                                                                                                                                                                                                                                                                       |                      |
|-----|----------------------------------------------------------------------------------------------|---------------------------------------------------------------------------------------------------------------------------------------------------------------------------------------------------------------------------------------------------------------------------------------------------------------------------------------|----------------------|
| 119 | What is the main material of the walls?                                                      | 1 = No walls<br>2 = Natural materials (cane, wood, mud, straw)<br>3 = Stone with mud<br>4 = Stone/bricks with cement<br>5 = Other                                                                                                                                                                                                     | <input type="text"/> |
| 120 | What is the main floor material?                                                             | 1 = Natural floor (earth/sand/dung)<br>2 = Rudimentary floor (wood/palm/bamboo)<br>3 = Finished floor (polished wood/vinyl/tiles/cement/carpet)<br>4 = Other                                                                                                                                                                          | <input type="text"/> |
| 121 | What is the main material of the roof?                                                       | 1 = Thatch/grass or leaves<br>2 = Iron sheets or tiles<br>3 = Other                                                                                                                                                                                                                                                                   | <input type="text"/> |
| 122 | What kind of toilet facilities does your household have?                                     | 1 = No facility/bush/field<br>2 = Pit toilet/latrine<br>3 = Flush toilet                                                                                                                                                                                                                                                              | <input type="text"/> |
| 123 | What is the main source of drinking water for the household?<br><br><b>Do not read list</b>  | 1 = Piped connection into house<br>2 = Piped connection into yard<br>3 = Public standpipes<br>4 = Boreholes<br>5 = Protected dug wells<br>6 = Protected springs<br>7 = Rainwater collection<br>8 = Surface water<br>9 = Open dug wells<br>10 = Unprotected springs<br>11 = Vendor provided water<br>12 = Bottled water<br>13 = Tanker | <input type="text"/> |
| 124 | Do you do anything to the water to make it safer to drink?                                   | 1 = Yes<br>2 = No-GO to 127<br>3 = Don't know --GO to 127                                                                                                                                                                                                                                                                             | <input type="text"/> |
| 125 | If yes, what is the main thing you do?<br><br><b>Do not read list</b>                        | 1 = Let it stand and settle<br>2 = Strain through a cloth<br>3 = Use water filter (ceramic/sand/composite/etc)<br>4 = Boil<br>5 = Solar disinfection<br>6 = Add bleach/chlorine<br>7 = Other<br>8 = Don't know                                                                                                                        | <input type="text"/> |
| 126 | If OTHER, specify                                                                            | Specify _____                                                                                                                                                                                                                                                                                                                         |                      |
| 127 | What type of fuel does your household mostly use for cooking?<br><br><b>Do not read list</b> | 1 = Dung<br>2 = Firewood/straw<br>3 = Charcoal<br>4 = Kerosene<br>5 = Gas<br>6 = Electricity<br>7 = Other                                                                                                                                                                                                                             | <input type="text"/> |
| 128 | Is the house connected to electricity?                                                       | 1 = Yes<br>2 = No                                                                                                                                                                                                                                                                                                                     | <input type="text"/> |

|                                                                                     |     |                                             |                      |
|-------------------------------------------------------------------------------------|-----|---------------------------------------------|----------------------|
| In total, how many of the following items are owned by residents of this household? |     | <b>Enter number of items (zero if none)</b> |                      |
|                                                                                     | 129 | Wrist watch                                 | <input type="text"/> |

|                                                            |                                                                               |                                                 |                                                                                                                               |           |
|------------------------------------------------------------|-------------------------------------------------------------------------------|-------------------------------------------------|-------------------------------------------------------------------------------------------------------------------------------|-----------|
| <b>Add the household total for each item</b>               |                                                                               | 130                                             | Gold (in grams)                                                                                                               | _ _       |
|                                                            |                                                                               | 131                                             | A kerosene lamp/pressure lamp                                                                                                 | _ _       |
|                                                            |                                                                               | 132                                             | A bed                                                                                                                         | _ _       |
|                                                            |                                                                               | 133                                             | Non-mobile phone                                                                                                              | _ _       |
|                                                            |                                                                               | 134                                             | Mobile phone                                                                                                                  | _ _       |
|                                                            |                                                                               | 135                                             | Bicycle                                                                                                                       | _ _       |
|                                                            |                                                                               | 136                                             | Car                                                                                                                           | _ _       |
|                                                            |                                                                               | 137                                             | Radio                                                                                                                         | _ _       |
|                                                            |                                                                               | 138                                             | TV                                                                                                                            | _ _       |
|                                                            |                                                                               | 139                                             | Fridge                                                                                                                        | _ _       |
| 140                                                        | Do you own this house?                                                        |                                                 | 1 = Yes<br>2 = No                                                                                                             | _         |
| 141                                                        | Does any member of the household own any agricultural land?                   |                                                 | 1 = Yes<br>2 = No-GO to 143                                                                                                   | _         |
| 142                                                        | How many hectares of agricultural land do members of this household own?      |                                                 | Enter total number of hectares<br>(If less than 1, Enter in decimals<br>(example 0.5)<br>Enter 9999 if hectares are not known | _ _ . _ _ |
| 143                                                        | Does this household own any livestock, herds, other farm animals, or poultry? |                                                 | 1 = Yes<br>2 = No-Go to Section 2                                                                                             | _         |
| How many of the following animals does this household own? |                                                                               | <b>For each: Enter number. If none, enter 0</b> |                                                                                                                               |           |
|                                                            |                                                                               | 144                                             | Chickens                                                                                                                      | _ _ _     |
|                                                            |                                                                               | 145                                             | Goats                                                                                                                         | _ _ _     |
|                                                            |                                                                               | 146                                             | Sheep                                                                                                                         | _ _ _     |
|                                                            |                                                                               | 147                                             | Donkeys                                                                                                                       | _ _ _     |
|                                                            |                                                                               | 148                                             | Horses                                                                                                                        | _ _ _     |
|                                                            |                                                                               | 149                                             | Mules                                                                                                                         | _ _ _     |
|                                                            |                                                                               | 150                                             | Camels                                                                                                                        | _ _ _     |
|                                                            |                                                                               | 151                                             | Milk cows                                                                                                                     | _ _ _     |
|                                                            |                                                                               | 152                                             | Bulls                                                                                                                         | _ _ _     |

**If there are no eligible women 13-49 in the household listing end interview here**

## Module 2

### 2. Identification of eligible women

**Interviewer:** These questions are to be asked of all resident women aged 13-49 who were listed. Ask to see eligible women from household listing in question 118. Start with the oldest eligible woman.

For each woman listed by the household head you must first complete the consent procedure (up to 204) before proceeding with the interview.

If unable to interview or complete the interview, state the reason and next appointment

| Visits                                                                                                                                                                                  | 1 <sup>st</sup>                                                    | 2 <sup>nd</sup>                                                    | 3 <sup>rd</sup>                                                    |
|-----------------------------------------------------------------------------------------------------------------------------------------------------------------------------------------|--------------------------------------------------------------------|--------------------------------------------------------------------|--------------------------------------------------------------------|
| Date<br>(dd/mm/yyyy)                                                                                                                                                                    | <input type="text"/> / <input type="text"/> / <input type="text"/> | <input type="text"/> / <input type="text"/> / <input type="text"/> | <input type="text"/> / <input type="text"/> / <input type="text"/> |
| <i>Interviewer's name</i>                                                                                                                                                               |                                                                    |                                                                    |                                                                    |
| <i>Result (Enter relevant code below)</i>                                                                                                                                               | <input type="text"/>                                               | <input type="text"/>                                               | <input type="text"/>                                               |
| <i>If not completed, next visit appointment date(dd/mm/yyyy)</i>                                                                                                                        | <input type="text"/> / <input type="text"/> / <input type="text"/> | <input type="text"/> / <input type="text"/> / <input type="text"/> |                                                                    |
| <i>If not completed, next visit appointment time</i>                                                                                                                                    |                                                                    |                                                                    |                                                                    |
| <b>Result Codes:</b><br><b>1. Completed</b><br><b>2. Partly completed</b><br><b>3. Postponed</b><br><b>4. Not at home</b><br><b>5. No-one competent to respond</b><br><b>6. Refused</b> |                                                                    |                                                                    |                                                                    |

If at the third visit, you are unable to complete the interview, please move on to the next woman in the household or the next household.

If possible please conduct the interview alone with the interviewee.



|     |                                                                                                                                                                                                   |                                   |   |
|-----|---------------------------------------------------------------------------------------------------------------------------------------------------------------------------------------------------|-----------------------------------|---|
| 212 | How many pregnancies have you had that did not end in a live birth?                                                                                                                               | Enter number                      | _ |
| 213 | <b><i>Now would like to ask about the information regarding pregnancies beginning of 2004 (Ethiopian calendar).</i></b><br>Were you pregnant at the time of Mäskäräm 2004 or any time afterwards? | 1 = Yes<br>2 = No (end interview) | _ |

***Now I would like to ask you about information on pregnancies at the time of Mäskäräm 2004 or afterwards. By this I mean all the pregnancies whether they ended up born alive, dead or even lost before full term pregnancy, whether they are still living or not, and whether they live with you or somewhere else.***

**Interviewer: start interview with a) asking the women to bring all the birth cards, if she has any, b) start with the birth outcome of the most recent pregnancy and work back to Mäskäräm 2004 (Ethiopian calendar). If the woman is currently pregnant do not include here – enter only pregnancies that have already ended.**

**For twin birth or two births, please record each baby separately (different lines, with different ID numbers)**

**Lost before full term is when baby was born before its due date, without woman going into labor.**

| ID Number of pregnancy           | Outcome of pregnancy                                              | Baby's name                           | Date of birth/Date Pregnancy ended                                    | Born as a twin?                     | Sex                                      | Still alive?      | If still alive, how old in completed months? | If the child died, when did s/he die?                                 |
|----------------------------------|-------------------------------------------------------------------|---------------------------------------|-----------------------------------------------------------------------|-------------------------------------|------------------------------------------|-------------------|----------------------------------------------|-----------------------------------------------------------------------|
| Start with most recent pregnancy | 1 = Live birth<br>2 = Baby born dead<br>3 = Lost before full term | Enter "not given" if not given a name | Enter 01 for day if not known.<br>Probe for months/years if not known | 1 = Yes<br>2 = No<br>3 = Don't know | 1 = Male<br>2 = Female<br>3 = Don't know | 1 = Yes<br>2 = No | If less than a 28 days enter number of days  | Enter 01 for day if not known.<br>Probe for months/years if not known |
| 1                                | _                                                                 |                                       | dd  _ _ <br>mm  _ _ <br>yyyy  _ _ _ _                                 | _                                   | _                                        | _                 | dd  _ _ <br>mm  _ _                          | dd  _ _ <br>mm  _ _ <br>yyyy  _ _ _ _                                 |
| 2                                | _                                                                 |                                       | dd  _ _ <br>mm  _ _ <br>yyyy  _ _ _ _                                 | _                                   | _                                        | _                 | dd  _ _ <br>mm  _ _                          | dd  _ _ <br>mm  _ _ <br>yyyy  _ _ _ _                                 |
| 3                                | _                                                                 |                                       | dd  _ _ <br>mm  _ _ <br>yyyy                                          | _                                   | _                                        | _                 | dd  _ _ <br>mm  _ _                          | dd  _ _ <br>mm  _ _ <br>yyyy  _ _ _ _                                 |



|   |   |  |                                             |   |   |   |                     |                                       |
|---|---|--|---------------------------------------------|---|---|---|---------------------|---------------------------------------|
|   |   |  | _ _ _ _                                     |   |   |   |                     |                                       |
| 4 | _ |  | dd  _ _ <br>mm  _ _ <br>yyyy<br>_ _ _ _     | _ | _ | _ | dd  _ _ <br>mm  _ _ | dd  _ _ <br>mm  _ _ <br>yyyy  _ _ _ _ |
| 5 | _ |  | dd  _ _ /<br>mm  _ _ /<br>yyyy<br>_ _ _ _ / | _ | _ | _ | dd  _ _ <br>mm  _ _ | dd  _ _ <br>mm  _ _ <br>yyyy  _ _ _ _ |
| 6 | _ |  | dd  _ _ /<br>mm  _ _ /<br>yyyy<br>_ _ _ _ / | _ | _ | _ | dd  _ _ <br>mm  _ _ | dd  _ _ <br>mm  _ _ <br>yyyy  _ _ _ _ |

|                                                                                                                         |                                                   |                   |   |
|-------------------------------------------------------------------------------------------------------------------------|---------------------------------------------------|-------------------|---|
| <b>According to the given pregnancy history since Mäskäräm 2004 (Ethiopian), I would like to confirm that you have:</b> |                                                   |                   |   |
| 214                                                                                                                     | Total number of live births = XX                  | 1 = Yes<br>2 = No | _ |
| 215                                                                                                                     | Total number born dead = XX                       | 1 = Yes<br>2 = No | _ |
| 216                                                                                                                     | Total number pregnancy loss before full term = XX | 1 = Yes<br>2 = No | _ |

**Note:** In case of discrepancy, the interviewer will revisit the pregnancy history with the respondent women

**Continue with interview for each reported pregnancy since Mäskäräm 2004(Ethiopian).**

## Module 3

### Section 3. Pregnancy ID

**Interviewer:** Please obtain child information from the pregnancy event table.

|     |                                                                                                                                                                   |                                                                                                                                                                                                                                                                                                                 |
|-----|-------------------------------------------------------------------------------------------------------------------------------------------------------------------|-----------------------------------------------------------------------------------------------------------------------------------------------------------------------------------------------------------------------------------------------------------------------------------------------------------------|
| 300 | <b>Write name of the child (if live birth)</b>                                                                                                                    | <div> <div> <div></div> </div> </div> Enter 99 if not live birth or name not given                                          |
| 301 | <b>Write unique ID of the pregnancy</b><br>Obtain from = cluster ID = Q107 /household ID = Q108 /Person (woman) number = Q118/pregnancy = pregnancy history table | <div> <div> <div></div> <div></div> <div></div> <div></div> </div> </div> <div> cluster household woman pregnancy </div> |

### Section 4. Antenatal care (ANC)

**Interviewer:** in instances where the birth ended in a stillbirth or pregnancy was lost, please use the pregnancy number to refer to the birth (instead of baby name)

*Now I want to talk to you about your pregnancy with the birth of [Child name / pregnancy number] (write no name if name was not given)*

#### Abbreviation code

HDA = Health Development Army

HEW = Health Extension Worker

|     |                                                                                                                 |                                                                                             |                                                  |
|-----|-----------------------------------------------------------------------------------------------------------------|---------------------------------------------------------------------------------------------|--------------------------------------------------|
| 400 | When pregnant with CHILD NAME / PREGNANCY NUMBER, did you inform anyone outside your family?                    | 1 = Yes<br>2 = No - GO to 404                                                               | <div> <div></div> <div></div> </div>             |
| 401 | If you informed a health worker, who did you first inform about your pregnancy amongst health workers           | 1 = HDA<br>2 = HEW<br>3 = Other health staff (i.e. nurse) at the health center<br>4 = Other | <div> <div></div> <div></div> </div>             |
| 402 | If OTHER                                                                                                        | Specify_____                                                                                |                                                  |
| 403 | What was the duration of your pregnancy when you informed an HEW, HDA or other health workers?                  | Write number of weeks<br>99 if don't know                                                   | <div> <div></div> <div></div> <div></div> </div> |
| 404 | Do you have a family health card with information about that pregnancy and birth?                               | 1 = Yes<br>2 = No - GO to 406                                                               | <div> <div></div> <div></div> </div>             |
| 405 | <b>If yes:</b> May I see your family health card?<br><br><b>Interviewer:</b> Is a family health card available? | 1 = Yes<br>2 = No                                                                           | <div> <div></div> <div></div> </div>             |

|                                                                                              |                                                                                                                                                                                                                                    |                                   |                          |                          |
|----------------------------------------------------------------------------------------------|------------------------------------------------------------------------------------------------------------------------------------------------------------------------------------------------------------------------------------|-----------------------------------|--------------------------|--------------------------|
| 406                                                                                          | When pregnant with [CHILD NAME / PREGNANCY NUMBER], did you receive any care during pregnancy?<br><br><b>Probe: care at the HP, at a health facility, or visits at home from a HEW/HDA</b><br><br><b>If no, skip ANC questions</b> | 1 = Yes<br>2 = No-GO to Section 6 | <input type="checkbox"/> |                          |
| If <b>YES</b> , where did you get for ANC visits?<br><br><b>Please select all that apply</b> |                                                                                                                                                                                                                                    | <b>For each: 1= Yes 2 = No</b>    |                          |                          |
|                                                                                              |                                                                                                                                                                                                                                    | 407                               | Home                     | <input type="checkbox"/> |
|                                                                                              |                                                                                                                                                                                                                                    | 408                               | Health Post              | <input type="checkbox"/> |
|                                                                                              |                                                                                                                                                                                                                                    | 409                               | Health Center            | <input type="checkbox"/> |
|                                                                                              |                                                                                                                                                                                                                                    | 410                               | Hospital                 | <input type="checkbox"/> |
|                                                                                              |                                                                                                                                                                                                                                    | 411                               | Other                    | <input type="checkbox"/> |
| 412                                                                                          | (Specify) _____                                                                                                                                                                                                                    |                                   |                          |                          |

|                                          |                                                                                                                                              |                                                                                                                                                                                                                         |                          |
|------------------------------------------|----------------------------------------------------------------------------------------------------------------------------------------------|-------------------------------------------------------------------------------------------------------------------------------------------------------------------------------------------------------------------------|--------------------------|
| <b>Antenatal care from a health post</b> |                                                                                                                                              |                                                                                                                                                                                                                         |                          |
| 413                                      | Did you receive pregnancy care from a health post?                                                                                           | 1 = Yes<br>2 = No – GO to 422                                                                                                                                                                                           | <input type="checkbox"/> |
| 414                                      | How many times did you attend the health post for pregnancy care in that pregnancy?                                                          | Enter the number of times<br>99 if don't know                                                                                                                                                                           | <input type="text"/>     |
| 415                                      | When did your first visit to the health post take place?<br><br><b>If this information is available from the family health card, use it.</b> | dd <input type="text"/> <input type="text"/> mm <input type="text"/> <input type="text"/> yyyy <input type="text"/> <input type="text"/> <input type="text"/> <input type="text"/><br>Write 99/99/9999 if not available |                          |
| 416                                      | <b>Interviewer: did Q415 information come from the woman or the card?</b>                                                                    | 1 = Woman<br>2 = Card                                                                                                                                                                                                   | <input type="checkbox"/> |
| 417                                      | How old was your pregnancy at the first visit?                                                                                               | Record number of weeks<br>99 if don't know                                                                                                                                                                              | <input type="text"/>     |
| 418                                      | <b>Interviewer: record gestation of the pregnancy at first ANC visit from family health card if available</b>                                | Record number of weeks<br>99 if not available                                                                                                                                                                           | <input type="text"/>     |

|     |                                                                                                                                                  |                                                                                                                     |   |
|-----|--------------------------------------------------------------------------------------------------------------------------------------------------|---------------------------------------------------------------------------------------------------------------------|---|
| 419 | Can you tell us whether or not you were satisfied with the pregnancy care you received at the health post?<br><b>Do not read list of options</b> | 1 = Yes was satisfied<br>2 = No was not satisfied (GO to 421)<br>3 = Neither satisfied nor dissatisfied (Go to 422) | _ |
| 420 | IF YES, then what was the level of satisfaction<br><b>Read both options</b>                                                                      | 1 = Fully satisfied-Go to 422<br>2 = Somewhat satisfied-Go to 422                                                   | _ |
| 421 | IF NO, then what was the level of dissatisfaction<br><b>Read both options</b>                                                                    | 1 = Fully dissatisfied<br>2 = Somewhat dissatisfied                                                                 | _ |

| Antenatal care from a health center |                                                                                                                                                            |                                                                                                                     |     |
|-------------------------------------|------------------------------------------------------------------------------------------------------------------------------------------------------------|---------------------------------------------------------------------------------------------------------------------|-----|
| 422                                 | Did you receive pregnancy care from a health center?                                                                                                       | 1 = Yes<br>2 = No- GO to 434                                                                                        | _   |
| 423                                 | Was your first ANC visit at a health center?                                                                                                               | 1 = Yes<br>2 = No                                                                                                   | _   |
| 424                                 | How many times did you attend the health center for pregnancy care in that pregnancy?                                                                      | <b>Enter the number of times</b><br>Enter 99 if not known                                                           | _ _ |
| 425                                 | When did your first visit to the health center take place?<br><b>Interviewer: Probe date of visit; record month and year if she does not remember date</b> | dd  _ _  mm  _ _  yyyy  _ _ _ _ <br>Write 99/99/9999 if not available                                               |     |
| 426                                 | <b>Interviewer: Record from family health card if available.</b>                                                                                           | dd  _ _  mm  _ _  yyyy  _ _ _ _ <br>Write 99/99/9999 if not available from family health card.                      |     |
| 427                                 | How old was your pregnancy at the first visit?<br><b>Record from family health card if available</b>                                                       | <b>Record number of weeks</b><br>99 if day is not known                                                             | _ _ |
| 428                                 | <b>Interviewer: did this information come from the woman or the card?</b>                                                                                  | 1 = Woman<br>2 = Card                                                                                               | _   |
| 429                                 | Who saw you at that first visit?                                                                                                                           | 1 = Nurse<br>2= Midwife<br>3=Health officer<br>4 = Other (HEW)<br>5=I don't know                                    | _   |
| 430                                 | If <b>OTHER</b> please specify                                                                                                                             | Specify _____                                                                                                       |     |
| 431                                 | Can you tell us whether or not you were satisfied with the pregnancy care you received at the health center?<br><b>Do not read list of options</b>         | 1 = Yes was satisfied<br>2 = No was not satisfied (GO to 433)<br>3 = Neither satisfied nor dissatisfied (Go to 434) | _   |
| 432                                 | IF YES, then what was the level of satisfaction<br><b>Read both options</b>                                                                                | 1 = Fully satisfied -Go to 434<br>2 = Somewhat satisfied-Go to 434                                                  | _   |

|     |                                                                               |                                                     |                      |
|-----|-------------------------------------------------------------------------------|-----------------------------------------------------|----------------------|
| 433 | IF NO, then what was the level of dissatisfaction<br><b>Read both options</b> | 1 = Fully dissatisfied<br>2 = Somewhat dissatisfied | <input type="text"/> |
|-----|-------------------------------------------------------------------------------|-----------------------------------------------------|----------------------|

|                                |                                                                                                                                       |                                                                                                                                                                                                              |                                                                |
|--------------------------------|---------------------------------------------------------------------------------------------------------------------------------------|--------------------------------------------------------------------------------------------------------------------------------------------------------------------------------------------------------------|----------------------------------------------------------------|
| <b>Antenatal care at home.</b> |                                                                                                                                       |                                                                                                                                                                                                              |                                                                |
| 434                            | Did you receive pregnancy care from a health worker in your own home?                                                                 | 1 = Yes<br>2 = No – GO to 445                                                                                                                                                                                | <input type="text"/>                                           |
| 435                            | How many times were you visited at home by a health worker for pregnancy care in that pregnancy?                                      | Enter the number of times                                                                                                                                                                                    | <input type="text"/>                                           |
| 436                            | When did the first visit to you at home take place?<br><b>Record from family health card if available</b>                             | dd <input type="text"/> <input type="text"/> mm <input type="text"/> <input type="text"/> yyyy <input type="text"/> <input type="text"/> <input type="text"/> <input type="text"/><br>99 if day is not known |                                                                |
| 437                            | <b>Interviewer: did Q436 information come from the woman or the card?</b>                                                             | 1 = Woman<br>2 = Card                                                                                                                                                                                        | <input type="text"/>                                           |
| 438                            | How old was your pregnancy the first time that you were visited at home for pregnancy care?                                           | Record number of weeks<br>Enter 99 if not available.                                                                                                                                                         | <input type="text"/> <input type="text"/> <input type="text"/> |
| 439                            | <b>Interviewer: Record from family health card if available.</b>                                                                      | Record number of weeks<br>Enter 99 if not available.                                                                                                                                                         | <input type="text"/> <input type="text"/> <input type="text"/> |
| 440                            | Who was it that came to visit you the first time?                                                                                     | 1 = HEW<br>2 = HDA<br>3 = Other                                                                                                                                                                              | <input type="text"/>                                           |
| 441                            | If <b>OTHER</b> please specify:                                                                                                       | Specify _____                                                                                                                                                                                                |                                                                |
| 442                            | Can you tell us whether or not you were satisfied with the pregnancy care you received at home?<br><b>Do not read list of options</b> | 1 = Yes was satisfied<br>2 = No was not satisfied (GO to 444)<br>3 = Neither satisfied nor dissatisfied (Go to 445)                                                                                          | <input type="text"/>                                           |
| 443                            | <b>IF YES,</b> then what was the level of satisfaction<br><b>Read both options</b>                                                    | 1 = Fully satisfied -Go to 445<br>2 = Somewhat satisfied-Go to 445                                                                                                                                           | <input type="text"/>                                           |
| 444                            | <b>IF NO,</b> then what was the level of dissatisfaction<br><b>Read both options</b>                                                  | 1 = Fully dissatisfied<br>2 = Somewhat dissatisfied                                                                                                                                                          | <input type="text"/>                                           |

**Interviewer: I would now like to ask you about who provided specific elements of pregnancy care.**

**In instances where birth was a still birth or pregnancy was lost, use the pregnancy number instead of name.**

**When you were pregnant with CHILD NAME / PREGNANCY NUMBER, did you have the following at any time?**

**Interviewer: this applies to cares at home, health or health centre**

|     |                           |                               |                      |
|-----|---------------------------|-------------------------------|----------------------|
| 445 | Was your weight measured? | 1 = Yes<br>2 = No – GO to 448 | <input type="text"/> |
|-----|---------------------------|-------------------------------|----------------------|

|     |                                                                                                                   |                                                                                          |                      |
|-----|-------------------------------------------------------------------------------------------------------------------|------------------------------------------------------------------------------------------|----------------------|
| 446 | Which was the provider who did this the first time?<br><b>Put 9 if not known</b>                                  | 1 = HDA<br>2 = HEW<br>3 = Nurse/midwife<br>4 = Health Officer<br>5 = Doctor<br>6 = Other | <input type="text"/> |
| 447 | In which location was this service provided?                                                                      | 1 = Home<br>2 = Health Post<br>3 = Health Centre<br>4 = Hospital<br>5 = Other            | <input type="text"/> |
| 448 | Was your height measured?                                                                                         | 1 = Yes<br>2 = No – GO to 451                                                            | <input type="text"/> |
| 449 | Which was the provider who did this the first time?<br><b>Put 9 if not known</b>                                  | 1 = HDA<br>2 = HEW<br>3 = Nurse/midwife<br>4 = Health Officer<br>5 = Doctor<br>6 = Other | <input type="text"/> |
| 450 | In which location was this service provided?                                                                      | 1 = Home<br>2 = Health Post<br>3 = Health Centre<br>4 = Hospital<br>5 = Other            | <input type="text"/> |
| 451 | Did you receive information about breastfeeding ]?                                                                | 1 = Yes<br>2 = No – GO to 454                                                            | <input type="text"/> |
| 452 | Which was the provider who did this the first time?<br><b>Put 9 if not known</b>                                  | 1 = HDA<br>2 = HEW<br>3 = Nurse/midwife<br>4 = Health Officer<br>5 = Doctor<br>6 = Other | <input type="text"/> |
| 453 | In which location was this service provided?                                                                      | 1 = Home<br>2 = Health Post<br>3 = Health Centre<br>4 = Hospital<br>5 = Other            | <input type="text"/> |
| 454 | Was your blood pressure tested?<br><b>(PROBE: when a strap was put around your upper arm and a measure taken)</b> | 1 = Yes<br>2 = No – GO to 457                                                            | <input type="text"/> |
| 455 | Which was the provider who did this the first time?<br><b>Put 9 if not known</b>                                  | 1 = HDA<br>2 = HEW<br>3 = Nurse/midwife<br>4 = Health Officer<br>5 = Doctor<br>6 = Other | <input type="text"/> |
| 456 | In which location was this service provided?                                                                      | 1 = Home<br>2 = Health Post<br>3 = Health Centre<br>4 = Hospital<br>5 = Other            | <input type="text"/> |
| 457 | Did you give a urine sample for a test?                                                                           | 1 = Yes<br>2 = No – GO to 460                                                            | <input type="text"/> |
| 458 | Which was the provider who did this the first time?<br><b>Put 9 if not known</b>                                  | 1 = HDA<br>2 = HEW<br>3 = Nurse/midwife<br>4 = Health Officer<br>5 = Doctor<br>6 = Other | <input type="text"/> |
| 459 | In which location was this service provided?                                                                      | 1 = Home<br>2 = Health Post<br>3 = Health Centre<br>4 = Hospital<br>5 = Other            | <input type="text"/> |

|     |                                                                                                                                                                                                              |                                                                                          |                      |
|-----|--------------------------------------------------------------------------------------------------------------------------------------------------------------------------------------------------------------|------------------------------------------------------------------------------------------|----------------------|
| 460 | Did you give blood for any test for syphilis?                                                                                                                                                                | 1 = Yes<br>2 = No – GO to 463<br>3 = Don't know – GO to 463                              | <input type="text"/> |
| 461 | Which was the provider who did this the first time?<br><b>Put 9 if not known</b>                                                                                                                             | 1 = HDA<br>2 = HEW<br>3 = Nurse/midwife<br>4 = Health Officer<br>5 = Doctor<br>6 = Other | <input type="text"/> |
| 462 | In which location was this service provided?                                                                                                                                                                 | 1 = Home<br>2 = Health Post<br>3 = Health Centre<br>4 = Hospital<br>5 = Other            | <input type="text"/> |
| 463 | Did you receive iron folate tablets or iron syrup?<br><b>Interviewer: show a sample or picture of iron tables/syrup and folate tablet</b>                                                                    | 1 = Yes<br>2 = No – GO to 467                                                            | <input type="text"/> |
| 464 | Which was the provider who did this the first time?<br><b>Put 9 if not known</b>                                                                                                                             | 1 = HDA<br>2 = HEW<br>3 = Nurse/midwife<br>4 = Health Officer<br>5 = Doctor<br>6 = Other | <input type="text"/> |
| 465 | In which location was this service provided?                                                                                                                                                                 | 1 = Home<br>2 = Health Post<br>3 = Health Centre<br>4 = Hospital<br>5 = Other            | <input type="text"/> |
| 466 | <b>If yes:</b> For how many days did you take the tablets or syrup?                                                                                                                                          | Enter number of days<br>Enter 999 if not known                                           | <input type="text"/> |
| 467 | Were you given an injection in the arm to prevent the baby from getting tetanus, that is, convulsions after birth?<br><b>(On field manual please explain the need to describe tetanus toxoid shots part)</b> | 1 = Yes<br>2 = No – GO to 473                                                            | <input type="text"/> |
| 468 | <b>If yes:</b> How many times did you get a tetanus injection?                                                                                                                                               | Write number of times                                                                    | <input type="text"/> |
| 469 | <b>If less than 2 times:</b> At any time before this pregnancy did you receive any tetanus injections?                                                                                                       | 1 = Yes<br>2 = No – GO to 473                                                            | <input type="text"/> |
| 470 | <b>If 469 is answered YES:</b> Before this pregnancy, how many times did you receive a tetanus injection?                                                                                                    | Enter number of times<br>Enter 99 if not known                                           | <input type="text"/> |
| 471 | <b>If 469 is answered YES:</b> How many years ago did you receive the last tetanus injection before this pregnancy?                                                                                          | Write number of years ago                                                                | <input type="text"/> |
| 472 | In which health facility was this service provided?                                                                                                                                                          | 1 = Home<br>2 = Health Post<br>3 = Health Centre<br>4 = Hospital<br>5 = Other            | <input type="text"/> |
| 473 | Did you receive HIV information?                                                                                                                                                                             | 1 = Yes<br>2 = No – GO to 476                                                            | <input type="text"/> |
| 474 | Which was the provider who did this the first time?<br><b>Put 9 if not known</b>                                                                                                                             | 1 = HDA<br>2 = HEW<br>3 = Nurse/midwife<br>4 = Health Officer<br>5 = Doctor<br>6 = Other | <input type="text"/> |
| 475 | In which location was this service provided?                                                                                                                                                                 | 1 = Home                                                                                 | <input type="text"/> |

|     |                                                                                  |                                                                                          |                          |
|-----|----------------------------------------------------------------------------------|------------------------------------------------------------------------------------------|--------------------------|
|     |                                                                                  | 2 = Health Post<br>3 = Health Centre<br>4 = Hospital<br>5 = Other                        |                          |
| 476 | Did you receive HIV testing?                                                     | 1 = Yes<br>2 = No – GO to 479                                                            | <input type="checkbox"/> |
| 477 | Which was the provider who did this the first time?<br><b>Put 9 if not known</b> | 1 = HDA<br>2 = HEW<br>3 = Nurse/midwife<br>4 = Health Officer<br>5 = Doctor<br>6 = Other | <input type="checkbox"/> |
| 478 | In which location was this service provided?                                     | 1 = Home<br>2 = Health Post<br>3 = Health Centre<br>4 = Hospital<br>5 = Other            | <input type="checkbox"/> |
| 479 | Did you receive STI testing?                                                     | 1 = Yes<br>2 = No – GO to 482                                                            | <input type="checkbox"/> |
| 480 | Which was the provider who did this the first time?<br><b>Put 9 if not known</b> | 1 = HDA<br>2 = HEW<br>3 = Nurse/midwife<br>4 = Health Officer<br>5 = Doctor<br>6 = Other | <input type="checkbox"/> |
| 481 | In which location was this service provided?                                     | 1 = Home<br>2 = Health Post<br>3 = Health Centre<br>4 = Hospital<br>5 = Other            | <input type="checkbox"/> |
| 482 | Did you receive any STI treatment?                                               | 1 = Yes<br>2 = No – GO to 485                                                            | <input type="checkbox"/> |
| 483 | Which was the provider who did this the first time?<br><b>Put 9 if not known</b> | 1 = HDA<br>2 = HEW<br>3 = Nurse/midwife<br>4 = Health Officer<br>5 = Doctor<br>6 = Other | <input type="checkbox"/> |
| 484 | In which location was this service provided?                                     | 1 = Home<br>2 = Health Post<br>3 = Health Centre<br>4 = Hospital<br>5 = Other            | <input type="checkbox"/> |
| 485 | Did you receive information on nutrition?                                        | 1 = Yes<br>2 = No – GO to 488<br>3 = Not applicable – GO to 488                          | <input type="checkbox"/> |
| 486 | Which was the provider who did this the first time?<br><b>Put 9 if not known</b> | 1 = HDA<br>2 = HEW<br>3 = Nurse/midwife<br>4 = Health Officer<br>5 = Doctor<br>6 = Other | <input type="checkbox"/> |
| 487 | In which location was this service provided?                                     | 1 = Home<br>2 = Health Post<br>3 = Health Centre<br>4 = Hospital<br>5 = Other            | <input type="checkbox"/> |



|                                            |                                                                                                                                                             |                                                                                          |                          |
|--------------------------------------------|-------------------------------------------------------------------------------------------------------------------------------------------------------------|------------------------------------------------------------------------------------------|--------------------------|
| 488                                        | Did you receive information on danger signs?                                                                                                                | 1 = Yes<br>2 = No – GO to 491                                                            | <input type="checkbox"/> |
| 489                                        | Which was the provider who did this the first time?<br><b>Put 9 if not known</b>                                                                            | 1 = HDA<br>2 = HEW<br>3 = Nurse/midwife<br>4 = Health Officer<br>5 = Doctor<br>6 = Other | <input type="checkbox"/> |
| 490                                        | In which location was this service provided?                                                                                                                | 1 = Home<br>2 = Health Post<br>3 = Health Centre<br>4 = Hospital<br>5 = Other            | <input type="checkbox"/> |
| 491                                        | Were you advised on birth preparedness and complication readiness?<br><b>Probe: for finances, for help during delivery, for transport, for emergencies?</b> | 1 = Yes<br>2 = No – GO to 501                                                            | <input type="checkbox"/> |
| 492                                        | Which was the provider who did this the first time?<br><b>Put 9 if not known</b>                                                                            | 1 = HDA<br>2 = HEW<br>3 = Nurse/midwife<br>4 = Health Officer<br>5 = Doctor<br>6 = Other | <input type="checkbox"/> |
| 493                                        | In which location was this service provided?                                                                                                                | 1 = Home<br>2 = Health Post<br>3 = Health Centre<br>4 = Hospital<br>5 = Other            | <input type="checkbox"/> |
| 494                                        | Was your birth preparedness and complication readiness plan recorded?                                                                                       | 1 = Yes<br>2 = No – GO to 501                                                            | <input type="checkbox"/> |
| 495                                        | Which was the provider who did this the first time?<br><b>Put 9 if not known</b>                                                                            | 1 = HDA<br>2 = HEW<br>3 = Nurse/midwife<br>4 = Health Officer<br>5 = Doctor<br>6 = Other | <input type="checkbox"/> |
| 496                                        | In which location was this service provided?                                                                                                                | 1 = Home<br>2 = Health Post<br>3 = Health Centre<br>4 = Hospital<br>5 = Other            | <input type="checkbox"/> |
| <b>Section 5. Antenatal care continued</b> |                                                                                                                                                             |                                                                                          |                          |
| 500                                        | Is there a record in family health card about her birth preparedness and complication plan?<br><b>Ask to see Family Health Card, if available.</b>          | 1 = Yes<br>2 = No<br>3 = No family health card                                           | <input type="checkbox"/> |

|                                                                                                                                           |                                 |                       |                          |
|-------------------------------------------------------------------------------------------------------------------------------------------|---------------------------------|-----------------------|--------------------------|
| Can you tell me danger signs during pregnancy?<br><br><b>Do not read list. Do not probe. This is about knowledge of danger signs, not</b> | <b>For each: 1 = Yes 2 = No</b> |                       |                          |
|                                                                                                                                           | 501                             | Vaginal bleeding      | <input type="checkbox"/> |
|                                                                                                                                           | 502                             | Severe abdominal pain | <input type="checkbox"/> |

|                                                                                                                                                                                                                         |                                                                                                                                                     |                                 |                                                      |                          |
|-------------------------------------------------------------------------------------------------------------------------------------------------------------------------------------------------------------------------|-----------------------------------------------------------------------------------------------------------------------------------------------------|---------------------------------|------------------------------------------------------|--------------------------|
| <b>about her own specific experience.</b>                                                                                                                                                                               |                                                                                                                                                     | 503                             | Offensive discharge from the birth canal             | <input type="checkbox"/> |
|                                                                                                                                                                                                                         |                                                                                                                                                     | 504                             | Fever                                                | <input type="checkbox"/> |
|                                                                                                                                                                                                                         |                                                                                                                                                     | 505                             | Headache, dizziness, or blurred vision               | <input type="checkbox"/> |
|                                                                                                                                                                                                                         |                                                                                                                                                     | 506                             | Convulsions or unconsciousness                       | <input type="checkbox"/> |
|                                                                                                                                                                                                                         |                                                                                                                                                     | 507                             | Swollen hands and face                               | <input type="checkbox"/> |
| <p>Can you tell me the components of birth preparedness and complication readiness plan</p> <p><b>Do not read list. Do not probe. This is about knowledge, not about her own specific experience with planning.</b></p> |                                                                                                                                                     | <b>For each: 1 = Yes 2 = No</b> |                                                      |                          |
|                                                                                                                                                                                                                         |                                                                                                                                                     | 508                             | Financial                                            | <input type="checkbox"/> |
|                                                                                                                                                                                                                         |                                                                                                                                                     | 509                             | Transport                                            | <input type="checkbox"/> |
|                                                                                                                                                                                                                         |                                                                                                                                                     | 510                             | Nutritious and sufficient food                       | <input type="checkbox"/> |
|                                                                                                                                                                                                                         |                                                                                                                                                     | 511                             | Identify birth attendant                             | <input type="checkbox"/> |
|                                                                                                                                                                                                                         |                                                                                                                                                     | 512                             | Identify facility where you would give birth         | <input type="checkbox"/> |
|                                                                                                                                                                                                                         |                                                                                                                                                     | 513                             | Identification of blood donor, if required           | <input type="checkbox"/> |
|                                                                                                                                                                                                                         |                                                                                                                                                     | 514                             | Clean clothes                                        | <input type="checkbox"/> |
|                                                                                                                                                                                                                         |                                                                                                                                                     | 515                             | Cover to deliver on                                  | <input type="checkbox"/> |
|                                                                                                                                                                                                                         |                                                                                                                                                     | 516                             | Gloves                                               | <input type="checkbox"/> |
|                                                                                                                                                                                                                         |                                                                                                                                                     | 517                             | Cotton gauze                                         | <input type="checkbox"/> |
|                                                                                                                                                                                                                         |                                                                                                                                                     | 518                             | Soap                                                 | <input type="checkbox"/> |
|                                                                                                                                                                                                                         |                                                                                                                                                     | 519                             | New razor blades                                     | <input type="checkbox"/> |
|                                                                                                                                                                                                                         |                                                                                                                                                     | 520                             | Sterilized scissors                                  | <input type="checkbox"/> |
|                                                                                                                                                                                                                         |                                                                                                                                                     | 521                             | Sterilized thread                                    | <input type="checkbox"/> |
| 522                                                                                                                                                                                                                     | <p>Did you make any preparations for your delivery?</p> <p><b>Probe: for finances, for help during delivery, for transport, for emergencies</b></p> |                                 | <p><b>1 = Yes</b><br/> <b>2 = No – GO to 539</b></p> | <input type="checkbox"/> |
| <p><b>If YES:</b> What preparations did you make for your delivery?</p> <p><b>Probe but do not read out the list. Select all that apply.</b></p>                                                                        |                                                                                                                                                     | <b>For each: 1 = Yes 2 = No</b> |                                                      |                          |
|                                                                                                                                                                                                                         |                                                                                                                                                     | 523                             | Financial                                            | <input type="checkbox"/> |
|                                                                                                                                                                                                                         |                                                                                                                                                     | 524                             | Transport                                            | <input type="checkbox"/> |
|                                                                                                                                                                                                                         |                                                                                                                                                     | 525                             | Nutritious and sufficient food                       | <input type="checkbox"/> |
|                                                                                                                                                                                                                         |                                                                                                                                                     | 526                             | Identify birth attendant                             | <input type="checkbox"/> |
|                                                                                                                                                                                                                         |                                                                                                                                                     | 527                             | Identify facility where you would give birth         | <input type="checkbox"/> |
|                                                                                                                                                                                                                         |                                                                                                                                                     | 528                             | Identification of blood donor, if required           | <input type="checkbox"/> |
|                                                                                                                                                                                                                         |                                                                                                                                                     | 529                             | Clean clothes                                        | <input type="checkbox"/> |

|                                                                                                                                |                                                                                                                                             |                                 |                                                                                                                                              |
|--------------------------------------------------------------------------------------------------------------------------------|---------------------------------------------------------------------------------------------------------------------------------------------|---------------------------------|----------------------------------------------------------------------------------------------------------------------------------------------|
|                                                                                                                                | 530                                                                                                                                         | Cover to deliver on             | <input type="checkbox"/>                                                                                                                     |
|                                                                                                                                | 531                                                                                                                                         | Gloves                          | <input type="checkbox"/>                                                                                                                     |
|                                                                                                                                | 532                                                                                                                                         | Cotton gauze                    | <input type="checkbox"/>                                                                                                                     |
|                                                                                                                                | 533                                                                                                                                         | Soap                            | <input type="checkbox"/>                                                                                                                     |
|                                                                                                                                | 534                                                                                                                                         | New razor blades                | <input type="checkbox"/>                                                                                                                     |
|                                                                                                                                | 535                                                                                                                                         | Sterilized scissors             | <input type="checkbox"/>                                                                                                                     |
|                                                                                                                                | 536                                                                                                                                         | Sterilized thread               | <input type="checkbox"/>                                                                                                                     |
|                                                                                                                                | 537                                                                                                                                         | Other                           | <input type="checkbox"/>                                                                                                                     |
|                                                                                                                                | 538                                                                                                                                         | Specify _____                   |                                                                                                                                              |
| 539                                                                                                                            | During your last pregnancy have you attended a pregnant women's conference/Forum?                                                           |                                 | 1 = Yes<br>2 = No- GO to 552 <input type="checkbox"/>                                                                                        |
| 540                                                                                                                            | If yes, how many times did you attend pregnant women's forum in your last pregnancy?                                                        |                                 | Enter number of times<br>Enter 99 if not known <input type="text"/>                                                                          |
| What was discussed in the pregnant women's forum?<br><br><b>Probe but do not read out the list.<br/>Select all that apply.</b> | For each: 1 = Yes 2 = No                                                                                                                    |                                 |                                                                                                                                              |
|                                                                                                                                | 541                                                                                                                                         | Birth preparedness              | <input type="checkbox"/>                                                                                                                     |
|                                                                                                                                | 542                                                                                                                                         | Importance of ANC               | <input type="checkbox"/>                                                                                                                     |
|                                                                                                                                | 543                                                                                                                                         | Institutional delivery          | <input type="checkbox"/>                                                                                                                     |
|                                                                                                                                | 544                                                                                                                                         | Importance of post natal checks | <input type="checkbox"/>                                                                                                                     |
|                                                                                                                                | 545                                                                                                                                         | Seeking newborn care            | <input type="checkbox"/>                                                                                                                     |
|                                                                                                                                | 546                                                                                                                                         | Other (specify)                 | <input type="checkbox"/>                                                                                                                     |
|                                                                                                                                | 547                                                                                                                                         | Specify _____                   |                                                                                                                                              |
| 548                                                                                                                            | Who informed you about the pregnant women's forum?                                                                                          |                                 | 1 = HDA<br>2 = HEW<br>3 = Other (Specify) <input type="checkbox"/>                                                                           |
| 549                                                                                                                            | If <b>OTHER</b> , specify                                                                                                                   |                                 | Specify _____                                                                                                                                |
| 550                                                                                                                            | Where did the pregnant women conference take place?                                                                                         |                                 | 1 = at HDA's place<br>2 = at gote/kebele meeting place<br>3 = health post<br>4 = health centre<br>5 = Other <input type="checkbox"/>         |
| 551                                                                                                                            | If <b>OTHER</b> , specify                                                                                                                   |                                 | Specify _____                                                                                                                                |
| 552                                                                                                                            | Can you tell us whether or not you were satisfied with the care you received while you were pregnant?<br><b>Do not read list of options</b> |                                 | 1 = Yes was satisfied<br>2 = No was not satisfied (GO to 554)<br>3 = Neither satisfied nor dissatisfied (Go to 555) <input type="checkbox"/> |

|     |                                                                               |                                                                   |    |
|-----|-------------------------------------------------------------------------------|-------------------------------------------------------------------|----|
|     |                                                                               |                                                                   |    |
| 553 | IF YES, then what was the level of satisfaction<br><b>Read both options</b>   | 1 = Fully satisfied-Go to 555<br>2 = Somewhat satisfied-Go to 555 | __ |
| 554 | IF NO, then what was the level of dissatisfaction<br><b>Read both options</b> | 1 = Fully dissatisfied<br>2 = Somewhat dissatisfied               | __ |

**Interviewer**

If the interviewee has reported having facility based care for ANC for this birth, ask the following questions

| <b>For each: 1 = Yes 2 = No</b>                                                                                                                                            |     |                                                                                                                                                |                          |
|----------------------------------------------------------------------------------------------------------------------------------------------------------------------------|-----|------------------------------------------------------------------------------------------------------------------------------------------------|--------------------------|
| <p>When having a pregnancy related medical examination at a health facility, did you experience any of the following with someone?</p> <p><b>Select all that apply</b></p> | 555 | Encourage you to ask questions about delivery                                                                                                  | <input type="checkbox"/> |
|                                                                                                                                                                            | 556 | Give you the choice for choosing any specific option (date of delivery, normal or operative delivery etc.)                                     | <input type="checkbox"/> |
|                                                                                                                                                                            | 557 | Unnecessarily motivating you for having C-section                                                                                              | <input type="checkbox"/> |
|                                                                                                                                                                            | 558 | Give explanation on the procedure s/he is going to use (e.g. normal delivery or c-section or time that is going to take)                       | <input type="checkbox"/> |
|                                                                                                                                                                            | 559 | Maintain privacy while examining you (e.g. placed a curtain/separator before examination)                                                      | <input type="checkbox"/> |
|                                                                                                                                                                            | 560 | Use non-dignified language (for example passing insulting and/or degrading statements about you/family/community/ethnicity) during examination | <input type="checkbox"/> |
|                                                                                                                                                                            | 561 | The primary care (senior doctor) provider deny to provide you services because you belong to any specific ethnic group/community               | <input type="checkbox"/> |
|                                                                                                                                                                            | 562 | Use harsh tone or shouted on you during examination                                                                                            | <input type="checkbox"/> |
|                                                                                                                                                                            | 563 | Use abusive language with you during examination                                                                                               | <input type="checkbox"/> |
|                                                                                                                                                                            | 564 | Threaten you e.g. if you do not cooperate I will do the caesarean operation during delivery                                                    | <input type="checkbox"/> |
|                                                                                                                                                                            | 565 | Leave you abandoned during examination                                                                                                         | <input type="checkbox"/> |
|                                                                                                                                                                            | 566 | Share results/diagnosis of medical reports with you during examination                                                                         | <input type="checkbox"/> |
|                                                                                                                                                                            | 567 | Share the results when other could easily hear                                                                                                 | <input type="checkbox"/> |
|                                                                                                                                                                            | 568 | Assure you that your medical information/records will be kept confidential                                                                     | <input type="checkbox"/> |
|                                                                                                                                                                            | 569 | Deny you providing any specific services (that you asked for) due to lack of money                                                             | <input type="checkbox"/> |

**If outcome of pregnancy is pregnancy lost (Outcome #3 in pregnancy history) stop interview and Check for other pregnancy**

| 6. Delivery care                                                                                                                       |                              |                                                                                                                                        |                      |
|----------------------------------------------------------------------------------------------------------------------------------------|------------------------------|----------------------------------------------------------------------------------------------------------------------------------------|----------------------|
| <b>Now I have some questions to ask you about what happened to you during and after the delivery for CHILD NAME / PREGNANCY NUMBER</b> |                              |                                                                                                                                        |                      |
| 600                                                                                                                                    | Where did you give birth?    | 1 = Home- GO to 602<br>2 = Health post – GO to 609<br>3 = Health centre – GO to 609<br>4 = Hospital – GO to 609<br>5 = Other (specify) | <input type="text"/> |
| 601                                                                                                                                    | If OTHER, please specify:    | Specify <input type="text"/>                                                                                                           |                      |
| If delivered at home, why?<br><br><b>Select all that apply</b>                                                                         | For each: 1 = Yes 2 = No     |                                                                                                                                        |                      |
|                                                                                                                                        | 602                          | Always delivered at home                                                                                                               | <input type="text"/> |
|                                                                                                                                        | 603                          | Husband/mother/mother-in-law does not allow                                                                                            | <input type="text"/> |
|                                                                                                                                        | 604                          | Don't like health facilities                                                                                                           | <input type="text"/> |
|                                                                                                                                        | 605                          | Expensive to go to health facilities                                                                                                   | <input type="text"/> |
|                                                                                                                                        | 606                          | Tradition/religious reason                                                                                                             | <input type="text"/> |
|                                                                                                                                        | 607                          | Other                                                                                                                                  | <input type="text"/> |
|                                                                                                                                        | 608                          | Specify <input type="text"/>                                                                                                           |                      |
| If delivered in health post, health centre or hospital, why?<br><br><b>Select all that apply</b>                                       | For each: 1 = Yes 2 = No     |                                                                                                                                        |                      |
|                                                                                                                                        | 609                          | Always delivered at a health facility                                                                                                  | <input type="text"/> |
|                                                                                                                                        | 610                          | Due to existing complications                                                                                                          | <input type="text"/> |
|                                                                                                                                        | 611                          | Referred by HDA/HEW                                                                                                                    | <input type="text"/> |
|                                                                                                                                        | 612                          | Advised at pregnant women's forum                                                                                                      | <input type="text"/> |
|                                                                                                                                        | 613                          | Taken to health facility due to prolonged labour or delivery related risks                                                             | <input type="text"/> |
|                                                                                                                                        | 614                          | Convenient                                                                                                                             | <input type="text"/> |
|                                                                                                                                        | 615                          | Affordable (free)                                                                                                                      | <input type="text"/> |
|                                                                                                                                        | 616                          | Other                                                                                                                                  | <input type="text"/> |
| 617                                                                                                                                    | Specify <input type="text"/> |                                                                                                                                        |                      |

|                                                                       |                                                                                                                                                                                               |                                                                                                                                                                |                             |                      |
|-----------------------------------------------------------------------|-----------------------------------------------------------------------------------------------------------------------------------------------------------------------------------------------|----------------------------------------------------------------------------------------------------------------------------------------------------------------|-----------------------------|----------------------|
| 618                                                                   | Who was the primary person that assisted you with the delivery?                                                                                                                               | 1 = Doctor<br>2 = Nurse/midwife<br>3 = Health extension worker<br>4 = HDA<br>5 = traditional birth attendant<br>6 = Relative/friend<br>7 = Nobody<br>8 = Other | <input type="text"/>        |                      |
| Who else was present at the delivery?<br><b>Select all that apply</b> |                                                                                                                                                                                               | <b>For each: 1 = Yes 2 = No</b>                                                                                                                                |                             |                      |
|                                                                       |                                                                                                                                                                                               | 619                                                                                                                                                            | Doctor                      | <input type="text"/> |
|                                                                       |                                                                                                                                                                                               | 620                                                                                                                                                            | Nurse/midwife               | <input type="text"/> |
|                                                                       |                                                                                                                                                                                               | 621                                                                                                                                                            | Health extension worker     | <input type="text"/> |
|                                                                       |                                                                                                                                                                                               | 622                                                                                                                                                            | HDA                         | <input type="text"/> |
|                                                                       |                                                                                                                                                                                               | 623                                                                                                                                                            | Traditional birth attendant | <input type="text"/> |
|                                                                       |                                                                                                                                                                                               | 624                                                                                                                                                            | Relative/friend             | <input type="text"/> |
|                                                                       |                                                                                                                                                                                               | 625                                                                                                                                                            | Nobody                      | <input type="text"/> |
|                                                                       |                                                                                                                                                                                               | 626                                                                                                                                                            | Other                       | <input type="text"/> |
| 627                                                                   | When you gave birth, did the main person assisting you wash her/his hands with soap before the delivery?                                                                                      | 1 = Yes<br>2 = No<br>3 = Don't know                                                                                                                            | <input type="text"/>        |                      |
| 628                                                                   | When you gave birth, did the main person assisting you wear gloves during delivery?                                                                                                           | 1 = Yes<br>2 = No<br>3 = Don't know                                                                                                                            | <input type="text"/>        |                      |
| 629                                                                   | When you gave birth, did the delivery take place on a clean surface? ( <b>Clean surface: clean space or carpet or mat</b> )                                                                   | 1 = Yes<br>2 = No<br>3 = Don't know                                                                                                                            | <input type="text"/>        |                      |
| 630                                                                   | Where you given a drug called misoprostol to help control bleeding? These are pills.                                                                                                          | 1 = Yes<br>2 = No<br>3 = Don't know                                                                                                                            | <input type="text"/>        |                      |
| 631                                                                   | <b>Interviewer: ask the following if the woman gave birth at a health facility, if no, SKIP to 633</b><br><br>After giving birth, how many days did you stay at the health facility in total? | Enter number of days.<br>Enter 0 if the woman left on the same day as delivery                                                                                 | <input type="text"/>        |                      |
| 632                                                                   | Was [CHILD NAME/ PREGNANCY NUMBER] delivered by caesarean, that is, did they cut your belly open to take the baby out?                                                                        | 1 = Yes<br>2 = No                                                                                                                                              | <input type="text"/>        |                      |

|                                                                                                                                 |  |                                |                           |                      |
|---------------------------------------------------------------------------------------------------------------------------------|--|--------------------------------|---------------------------|----------------------|
| During the delivery of [CHILD NAME / PREGNANCY NUMBER] did you experience any of the following?<br><br><b>Read out the list</b> |  | <b>For each 1 = Yes 2 = No</b> |                           |                      |
|                                                                                                                                 |  | 633                            | Heavy bleeding            | <input type="text"/> |
|                                                                                                                                 |  | 634                            | Labour more than 12 hours | <input type="text"/> |
|                                                                                                                                 |  | 635                            | Loss of consciousness     | <input type="text"/> |

|  |     |                           |                          |
|--|-----|---------------------------|--------------------------|
|  | 636 | Premature labour          | <input type="checkbox"/> |
|  | 637 | Foul discharge            | <input type="checkbox"/> |
|  | 638 | Baby in abnormal position | <input type="checkbox"/> |

|     |                                                                                                                                                    |                                                                                                                                                                                          |                          |
|-----|----------------------------------------------------------------------------------------------------------------------------------------------------|------------------------------------------------------------------------------------------------------------------------------------------------------------------------------------------|--------------------------|
| 639 | During delivery were you advised to go to a higher health facility to get special care?                                                            | 1 = Yes<br>2 = No – GO to 646                                                                                                                                                            | <input type="checkbox"/> |
| 640 | What was the reason for which you were referred?<br><b>Interviewer: please check if there is a record on referral; danger signs = see the list</b> | 1 = Due to existence of one or more danger signs<br>2 = Due to lack of equipment/space<br>3 = Due to lack of trained human resources<br>4 = Other                                        | <input type="checkbox"/> |
| 641 | If <b>OTHER</b> , please specify                                                                                                                   | Specify _____                                                                                                                                                                            |                          |
| 642 | When you were referred to a higher health facility, did you go to the higher health facility?                                                      | 1 = Yes – GO to 645<br>2 = No                                                                                                                                                            | <input type="checkbox"/> |
| 643 | If <b>NO</b> , why?                                                                                                                                | 1 = Facility was too far<br>2 = Cost too much money<br>3 = Don't like going to different facility<br>4 = No permission to go<br>5 = Don't like the quality of care provided<br>6 = Other | <input type="checkbox"/> |
| 644 | If <b>OTHER</b> please specify                                                                                                                     | Specify _____                                                                                                                                                                            |                          |
| 645 | Was ambulance made available for you for that referral?                                                                                            | 1 = Yes<br>2 = No                                                                                                                                                                        | <input type="checkbox"/> |
| 646 | Can you tell us whether or not you were satisfied with the delivery care you received?<br><b>Do not read list of options</b>                       | 1 = Yes was satisfied<br>2 = No was not satisfied (GO to 648)<br>3 = Neither satisfied nor dissatisfied (Go to 649)                                                                      | <input type="checkbox"/> |
| 647 | IF YES, then what was the level of satisfaction<br><b>Read both options</b>                                                                        | 1 = Fully satisfied -Go to 649<br>2 = Somewhat satisfied -Go to 649                                                                                                                      | <input type="checkbox"/> |
| 648 | IF NO, then what was the level of dissatisfaction<br><b>Read both options</b>                                                                      | 1 = Fully dissatisfied<br>2 = Somewhat dissatisfied                                                                                                                                      | <input type="checkbox"/> |



**Interviewer**

Only ask if participant reported having given a birth at a facility ask the following questions (649– 670)

| For each: 1 = Yes 2 = No                                                                                                                |                                                                                 |                                                                                                                              |    |
|-----------------------------------------------------------------------------------------------------------------------------------------|---------------------------------------------------------------------------------|------------------------------------------------------------------------------------------------------------------------------|----|
| <p>During a birth at a health facility, did you experience any of the following with someone?</p> <p><b>Select all that apply</b></p>   | 649                                                                             | Regularly explain and inform you about the progress or procedure being performed                                             | __ |
|                                                                                                                                         | 650                                                                             | Cover you while taking to the delivery room                                                                                  | __ |
|                                                                                                                                         | 651                                                                             | Delay in providing care after a decision has been made e.g. caesarean section                                                | __ |
|                                                                                                                                         | 652                                                                             | Use abusive language with you during the delivery                                                                            | __ |
|                                                                                                                                         | 653                                                                             | Leave you abandoned during the delivery                                                                                      | __ |
|                                                                                                                                         | 654                                                                             | Perform any procedure without your consent or informing you (like caesarean sections, blood transfusion, sterilization etc.) | __ |
|                                                                                                                                         | 655                                                                             | Ignore you while asking pain relief/medication during delivery                                                               | __ |
|                                                                                                                                         | 656                                                                             | Use harsh tone or shouted on you during the delivery                                                                         | __ |
|                                                                                                                                         | 657                                                                             | Slap you during the delivery                                                                                                 | __ |
|                                                                                                                                         | 658                                                                             | Pinch you irritably during the delivery                                                                                      | __ |
|                                                                                                                                         | 659                                                                             | Beat you during the delivery                                                                                                 | __ |
|                                                                                                                                         | 660                                                                             | Push you badly to change your position during the delivery                                                                   | __ |
| <p>Soon after giving birth at a facility, did you experience any of the following with someone?</p> <p><b>Select all that apply</b></p> | For each: 1 = Yes 2 = No                                                        |                                                                                                                              |    |
|                                                                                                                                         | 661                                                                             | Encourage you to ask questions post-delivery                                                                                 | __ |
|                                                                                                                                         | 662                                                                             | Cover you after the delivery                                                                                                 | __ |
|                                                                                                                                         | 663                                                                             | Ignore you while asking pain relief/medication after the delivery                                                            |    |
|                                                                                                                                         | 664                                                                             | Leave you abandoned immediately after the delivery                                                                           | __ |
|                                                                                                                                         | 665                                                                             | Use harsh tone or shouted on you after the delivery                                                                          | __ |
|                                                                                                                                         | 666                                                                             | Use abusive language with you after the delivery                                                                             | __ |
|                                                                                                                                         | 667                                                                             | Ask you to clean delivery couches post-delivery                                                                              | __ |
|                                                                                                                                         | 668                                                                             | Ask you to clean dirty bathroom/toilets post-delivery                                                                        | __ |
| 669                                                                                                                                     | Detain for non/partial-payment (e.g. keep you or your child in custody for full | __                                                                                                                           |    |

|     |                                              |                   |                      |
|-----|----------------------------------------------|-------------------|----------------------|
|     |                                              | payment)          |                      |
| 670 | Did you know where to go to lodge a complain | 1 = Yes<br>2 = No | <input type="text"/> |

## 7. Postnatal care of the mother (PNC)

Now I want to ask you about any postnatal checks you had for your own health after that birth

|     |                                                                                                                                                           |                                                                                       |                      |
|-----|-----------------------------------------------------------------------------------------------------------------------------------------------------------|---------------------------------------------------------------------------------------|----------------------|
| 700 | Did anyone check on your <u>own</u> health within 6 weeks of giving birth?<br><br><b>Probe to see if check was done by HEW/HC staff/HDA/Nurse/Doctor.</b> | 1 = Yes<br>2 = No – GO to Section 8                                                   | <input type="text"/> |
| 701 | How many days after giving birth did you have your first health check?<br><br><b>Clarify that this is a health check for the mother</b>                   | Enter number of days<br>Enter 99 if not known                                         | <input type="text"/> |
| 702 | Where did the first check take place?                                                                                                                     | 1 = In own home<br>2 = Health post<br>3 = Health centre<br>4 = Hospital<br>5 = Other  | <input type="text"/> |
| 703 | By whom?<br><b>Put 9 if not known</b>                                                                                                                     | 1 = Doctor<br>2 = Nurse/midwife<br>3 = HEW<br>4 = Health Officer/Assistant<br>5 = HDA | <input type="text"/> |
| 704 | Was a second visit conducted?                                                                                                                             | 1 = Yes<br>2 = No – GO to 712                                                         | <input type="text"/> |
| 705 | How many days after giving birth did you have your second health check?<br><b>Clarify that this is a health check for the mother.</b>                     | Enter number of days<br>Enter 99 if not known                                         | <input type="text"/> |
| 706 | Where did the checking take place?                                                                                                                        | 1 = In own home<br>2 = Health post<br>3 = Health centre<br>4 = Hospital<br>5 = Other  | <input type="text"/> |
| 707 | By whom?<br><b>Put 9 if not known</b>                                                                                                                     | 1 = Doctor<br>2 = Nurse/midwife<br>3 = HEW<br>4 = Health Officer/Assistant<br>5 = HDA | <input type="text"/> |
| 708 | Was a third visit conducted?                                                                                                                              | 1 = Yes<br>2 = No – GO to 712                                                         | <input type="text"/> |
| 709 | How many days after giving birth did you have your third health check?<br><b>Clarify that this is a health check for the mother.</b>                      | Enter number of days<br>Enter 99 if not known                                         | <input type="text"/> |
| 710 | Where did the checking take place?                                                                                                                        | 1 = In own home<br>2 = Health post<br>3 = Health centre<br>4 = Hospital<br>5 = Other  | <input type="text"/> |

|     |                                       |                                                                                       |                      |
|-----|---------------------------------------|---------------------------------------------------------------------------------------|----------------------|
| 711 | By whom?<br><b>Put 9 if not known</b> | 1 = Doctor<br>2 = Nurse/midwife<br>3 = HEW<br>4 = Health Officer/Assistant<br>5 = HDA | <input type="text"/> |
|-----|---------------------------------------|---------------------------------------------------------------------------------------|----------------------|

During visits after giving birth, what was done to check your health?

**Read List out loud**

**Mark all that apply**

**If the visit did not happen at specified time, leave that column of answers blank**

|                                                     | For each: 1 = Yes 2 = No |                      |              |                      |              |                      |
|-----------------------------------------------------|--------------------------|----------------------|--------------|----------------------|--------------|----------------------|
|                                                     | (Question #)             | 0-2 days             | (Question #) | 3-7 days             | (Question #) | 8-42 days            |
| Checked breasts                                     | 712                      | <input type="text"/> | 713          | <input type="text"/> | 714          | <input type="text"/> |
| Advised breast feeding                              | 715                      | <input type="text"/> | 716          | <input type="text"/> | 717          | <input type="text"/> |
| Oriented about danger signs                         | 718                      | <input type="text"/> | 719          | <input type="text"/> | 720          | <input type="text"/> |
| Educated on family planning                         | 721                      | <input type="text"/> | 722          | <input type="text"/> | 723          | <input type="text"/> |
| Information given on nutrition                      | 724                      | <input type="text"/> | 725          | <input type="text"/> | 726          | <input type="text"/> |
| Referred to a health facility                       | 727                      | <input type="text"/> | 728          | <input type="text"/> | 729          | <input type="text"/> |
| Measured Blood Pressure                             | 730                      | <input type="text"/> | 731          | <input type="text"/> | 732          | <input type="text"/> |
| Checked/treated birth-related wound (if applicable) | 733                      | <input type="text"/> | 734          | <input type="text"/> | 735          | <input type="text"/> |
| Other                                               | 736                      | <input type="text"/> | 737          | <input type="text"/> | 738          | <input type="text"/> |
| Specify _____                                       |                          |                      |              |                      |              |                      |

|     |                                                                                                                                                                                                            |                                                                                                                           |                      |
|-----|------------------------------------------------------------------------------------------------------------------------------------------------------------------------------------------------------------|---------------------------------------------------------------------------------------------------------------------------|----------------------|
| 739 | Can you tell us whether or not you were satisfied with the post-natal care you received?<br><br><b>Interviewer: explain that this is care for the mother, not the newborn. Do not read list of options</b> | 1 = Yes was satisfied<br>2 = No was not satisfied (GO to 741)<br>3 = Neither satisfied nor dissatisfied (Go to Section 8) | <input type="text"/> |
| 740 | IF YES, then what was the level of satisfaction<br><b>Read both options</b>                                                                                                                                | 1 = Fully satisfied (Go to Section 8)<br>2 = Somewhat satisfied (Go to Section 8)                                         | <input type="text"/> |
| 741 | IF NO, then what was the level of dissatisfaction<br><b>Read both options</b>                                                                                                                              | 1 = Fully dissatisfied<br>2 = Somewhat dissatisfied                                                                       | <input type="text"/> |

**INTERVIEWER: IF THE PREGNANCY OUTCOME IN THE PREGNANCY HISTORY TABLE WAS#2 (STILLBIRTH), END THE INTERVIEW HERE AND CHECK FOR OTHER PREGNANCIES**

## 8. Immediate newborn care

Now I have some questions about what happened to [CHILD NAME] at birth and immediately afterwards.

|     |                                                                 |                                                                                                                                                 |         |
|-----|-----------------------------------------------------------------|-------------------------------------------------------------------------------------------------------------------------------------------------|---------|
| 800 | Interviewer: What is the pregnancy ID number of [CHILD NAME]?   | Enter ID number from the table                                                                                                                  | _       |
| 801 | Was this a single birth?                                        | 1 = Yes<br>2 = No                                                                                                                               | _       |
| 802 | Was [CHILD NAME] weighed at birth?                              | 1 = Yes<br>2 = No – GO to 804<br>3 = Don't know– GO to 804                                                                                      | _       |
| 803 | If YES: how much did [CHILD NAME] weigh at birth?               | Enter weight in grams e.g. if the weight was 1.9 kilogrammes enter 1900; don't know write 9999. Use the weight recorded on the card if possible | _ _ _ _ |
| 804 | Did [CHILD NAME] have any difficulty crying/breathing at birth? | 1 = Yes<br>2 = No – GO to 807<br>3 = Don't know                                                                                                 | _       |

|                                                                                                                 |                          |                              |   |
|-----------------------------------------------------------------------------------------------------------------|--------------------------|------------------------------|---|
| Did anyone do any of the following to [CHILD NAME] immediately after birth?<br><br><b>Select all that apply</b> | For each: 1 = Yes 2 = No |                              |   |
|                                                                                                                 | 805                      | Rubbing/stimulating          | _ |
|                                                                                                                 | 806                      | Mouth-to-mouth/resuscitation | _ |

|     |                                                                                                                                                               |                                                                                                                                            |         |
|-----|---------------------------------------------------------------------------------------------------------------------------------------------------------------|--------------------------------------------------------------------------------------------------------------------------------------------|---------|
| 807 | Where was [CHILD NAME] placed immediately after delivery?                                                                                                     | 1 = Alone/on the floor<br>2 = On the mother's Belly/chest<br>3 = Beside the mother<br>4 = With someone else<br>5 = Other<br>6 = Don't know | _       |
| 808 | How long after [CHILD NAME] was born was s/he dried/wiped?<br><br><b>Check for time after the baby was born, not time after the placenta came out.</b>        | Enter in minutes, 999 if don't know.                                                                                                       | _ _ _ _ |
| 809 | How long after [CHILD NAME] was born was s/he wrapped in a cloth?<br><br><b>Check for time after the baby was born, not time after the placenta came out.</b> | Enter in minutes, 999 if don't know.                                                                                                       | _ _ _ _ |

|     |                                                           |                                                                                                                                       |                      |
|-----|-----------------------------------------------------------|---------------------------------------------------------------------------------------------------------------------------------------|----------------------|
| 810 | What was used to tie the cord?                            | 1 = New string/thread<br>2 = Boiled string/thread<br>3 = Any string/thread<br>4 = Clamp<br>5 = Nothing<br>6 = Don't know<br>7 = Other | <input type="text"/> |
| 811 | What was used to cut the cord?                            | 1 = new razor blade<br>2 = any razor blade<br>3 = sterilized scissors<br>4 = any scissors<br>5 = don't know<br>6 = other              | <input type="text"/> |
| 812 | Was anything applied to the cord after cutting and tying? | 1 = Yes<br>2 = No – GO to 824                                                                                                         | <input type="text"/> |

|                                                                                                                             |                                                                    |                                                                                                                                      |                      |
|-----------------------------------------------------------------------------------------------------------------------------|--------------------------------------------------------------------|--------------------------------------------------------------------------------------------------------------------------------------|----------------------|
| <b>If yes:</b> What was applied to the cord just after cutting the cord?<br><br><b>Do not prompt, select all that apply</b> |                                                                    | <b>For each: 1 = Yes 2 = No</b>                                                                                                      |                      |
|                                                                                                                             | 813                                                                | Butter                                                                                                                               | <input type="text"/> |
|                                                                                                                             | 814                                                                | Ash                                                                                                                                  | <input type="text"/> |
|                                                                                                                             | 815                                                                | Ointment (non-medicinal)                                                                                                             | <input type="text"/> |
|                                                                                                                             | 816                                                                | Animal dung                                                                                                                          | <input type="text"/> |
|                                                                                                                             | 817                                                                | Oil                                                                                                                                  | <input type="text"/> |
|                                                                                                                             | 818                                                                | Cold water                                                                                                                           | <input type="text"/> |
| 819                                                                                                                         | Other                                                              | <input type="text"/>                                                                                                                 |                      |
| 820                                                                                                                         | Was an antiseptic applied to the cord?                             | 1 = Yes<br>2 = No – GO to 824<br>3 = Don't know– GO to 824                                                                           | <input type="text"/> |
| 821                                                                                                                         | If yes, was this chlorhexidine?                                    | 1 = Yes<br>2 = No– GO to 824<br>3 = Don't know– GO to 824                                                                            | <input type="text"/> |
| 822                                                                                                                         | If YES, for how many days was chlorhexidine applied?               | Enter number of days<br>Enter 99 if not known                                                                                        | <input type="text"/> |
| 823                                                                                                                         | If YES, how many times per day was chlorhexidine applied?          | Enter number of times applied per day<br>Enter 99 if not known                                                                       | <input type="text"/> |
| 824                                                                                                                         | Did [CHILD NAME] receive TTC eye ointment soon after delivery?     | 1 = Yes<br>2 = No<br>3 = Don't know                                                                                                  | <input type="text"/> |
| 825                                                                                                                         | When [CHILD NAME] was born, how soon did you bathe him/her?        | 1 = In the first hour<br>2 = After one hour – GO to 827<br>3 = After one day– GO to 828                                              | <input type="text"/> |
| 826                                                                                                                         | <b>If in the first hour:</b> After how many minutes would you say? | Write number of minutes.<br>Enter 99 if don't know.                                                                                  | <input type="text"/> |
| 827                                                                                                                         | <b>If after one hour:</b> After how many hours would you say?      | Write number of full hours.<br>e.g. if response is 'after one hour' enter 1, if response is 'after one and a half hours' enter 1, if | <input type="text"/> |

|     |                                                                                                                                        |                                                                                                                                                                             |       |
|-----|----------------------------------------------------------------------------------------------------------------------------------------|-----------------------------------------------------------------------------------------------------------------------------------------------------------------------------|-------|
|     |                                                                                                                                        | response is 'after two and a half hours' enter 2.<br>Enter 99 if don't know.                                                                                                |       |
| 828 | <b>If after one day:</b> After how many days would you say?                                                                            | Write number of full days.<br><br>e.g. if response is 'after one day' enter 1, if response is 'after one and a half days' enter 1.<br>Enter 99 if don't know.               | _ _ _ |
| 829 | In the first week of life, did you hold [CHILD NAME] skin to skin against your breasts during the daytime and night-time?              | 1 = Yes, 1-7 times a day<br>2 = Yes, 8-12 times a day<br>3 = Yes, more than 12 times a day<br>4 = Never<br>5 = Don't know                                                   | _     |
| 830 | In the first week of life, did you sleep with [CHILD NAME] against you at night, or did you lay him/her alone on the bed or elsewhere? | 1 = Slept with mother<br>2 = Baby slept alone<br>3 = Baby slept with another person                                                                                         | _     |
| 831 | Did you ever breastfeed [CHILD NAME]?                                                                                                  | 1 = Yes<br>2 = No                                                                                                                                                           | _     |
| 832 | Did you exclusively breastfed [CHILD NAME] during the first 28 days of life?                                                           | 1 = Yes – GO to 837<br>2 = No                                                                                                                                               | _     |
| 833 | If No, what did you mainly give [CHILD NAME], other than breastmilk?                                                                   | 1 = Water<br>2 = Non-human milk<br>3 = Butter<br>4 = Sugar/glucose/salt water solution<br>5 = Juice<br>6 = Tea/infusions<br>7 = Other                                       | _     |
| 834 | If OTHER, specify                                                                                                                      | Specify _____                                                                                                                                                               |       |
| 835 | And, why did you provide other drinks besides your breast milk?                                                                        | 1 = My breast milk is not enough<br>2 = I do not stay with NAME throughout the day<br>3 = Advised by friends or relatives to do so<br>4 = Tradition or culture<br>5 = Other | _     |
| 836 | If OTHER, specify                                                                                                                      | Specify _____                                                                                                                                                               |       |
| 837 | How long after birth did you first put [CHILD NAME] to the breast?                                                                     | 1 = In the first hour<br>2 = After one hour but during the first day<br>3 = After the first day of life                                                                     | _     |
| 838 | Did you squeeze out and throw away the first milk?                                                                                     | 1 = Yes<br>2 = No                                                                                                                                                           | _     |

|     |                                                                                                                                                                                                                                                     |                                                                                                       |                      |
|-----|-----------------------------------------------------------------------------------------------------------------------------------------------------------------------------------------------------------------------------------------------------|-------------------------------------------------------------------------------------------------------|----------------------|
| 839 | In the first 6 weeks after [CHILD NAME] was born, did any health care provider excluding traditional birth attendant check on his/her health?<br><br><b>Probe for checks done at the place of birth on the same day as birth, and checks after.</b> | 1 = Yes<br>2 = No - GO to 892                                                                         | <input type="text"/> |
| 840 | If YES, how many days after birth was [CHILD NAME]'s first health check?                                                                                                                                                                            | Enter number of days<br>Enter 99 if not known                                                         | <input type="text"/> |
| 841 | If YES, where did the health checks on [CHILD NAME] take place?                                                                                                                                                                                     | 1 = In own home<br>2 = Health post<br>3 = Health centre<br>4 = Hospital<br>5 = Other                  | <input type="text"/> |
| 842 | If YES, who checked on the health of [CHILD NAME]?<br><b>Probe for most qualified person</b>                                                                                                                                                        | 1 = Doctor<br>2 = Nurse/midwife<br>3 = HEW<br>4 = Health Officer/Assistant<br>5 = HDA<br>6=Don't know | <input type="text"/> |
| 843 | Was a second check conducted?                                                                                                                                                                                                                       | 1 = Yes<br>2 = No - GO to 855                                                                         | <input type="text"/> |
| 844 | If YES, how many days after birth was [CHILD NAME]'s second health check?                                                                                                                                                                           | Enter number of days<br>Enter 99 if not known                                                         | <input type="text"/> |
| 845 | If YES, Where did the health checks on [CHILD NAME] take place?                                                                                                                                                                                     | 1 = In own home<br>2 = Health post<br>3 = Health centre<br>4 = Hospital<br>5 = Other                  | <input type="text"/> |
| 846 | If YES, Who checked on the health of [CHILD NAME]?<br><b>Probe for most qualified person</b>                                                                                                                                                        | 1 = Doctor<br>2 = Nurse/midwife<br>3 = HEW<br>4 = Health Officer/Assistant<br>5 = HDA<br>6=Don't know | <input type="text"/> |
| 847 | Was a third check conducted?                                                                                                                                                                                                                        | 1 = Yes<br>2 = No - GO to 855                                                                         | <input type="text"/> |
| 848 | If YES- how many days after birth was [CHILD NAME]'s third health check?                                                                                                                                                                            | Enter number of days<br>Enter 99 if not known                                                         | <input type="text"/> |
| 849 | If YES, Where did the health checks on [CHILD NAME] take place?                                                                                                                                                                                     | 1 = In own home<br>2 = Health post<br>3 = Health centre<br>4 = Hospital<br>5 = Other                  | <input type="text"/> |
| 850 | If YES, Who checked on the health of [CHILD NAME]?<br><b>Probe for most qualified person</b>                                                                                                                                                        | 1 = Doctor<br>2 = Nurse/midwife<br>3 = HEW<br>4 = Health Officer/Assistant<br>5 = HDA<br>6=Don't know | <input type="text"/> |

|     |                                                                          |                                                                                                       |                          |
|-----|--------------------------------------------------------------------------|-------------------------------------------------------------------------------------------------------|--------------------------|
| 851 | Was a forth check conducted?                                             | 1 = Yes<br>2 = No - GO to 855                                                                         | <input type="checkbox"/> |
| 852 | If YES, how many days after birth was [CHILD NAME]'s forth health check? | Enter number of days<br>Enter 99 if not known                                                         | <input type="text"/>     |
| 853 | Where did the checking take place?                                       | 1 = In own home<br>2 = Health post<br>3 = Health centre<br>4 = Hospital<br>5 = Other                  | <input type="checkbox"/> |
| 854 | By whom?                                                                 | 1 = Doctor<br>2 = Nurse/midwife<br>3 = HEW<br>4 = Health Officer/Assistant<br>5 = HDA<br>6=Don't know | <input type="checkbox"/> |

|                                                                                              |                                 |                          |              |                          |              |                          |
|----------------------------------------------------------------------------------------------|---------------------------------|--------------------------|--------------|--------------------------|--------------|--------------------------|
| At any of the health checks, what was done to check the health of [CHILD NAME]?              |                                 |                          |              |                          |              |                          |
| <b>Interviewer: Read list out loud. Mark all that apply</b>                                  |                                 |                          |              |                          |              |                          |
| <b>If the visit did not happen at the specified time, leave that column of answers blank</b> |                                 |                          |              |                          |              |                          |
|                                                                                              | <b>For each: 1 = Yes 2 = No</b> |                          |              |                          |              |                          |
|                                                                                              | (Question #)                    | 0-2 days                 | (Question #) | 3-7 days                 | (Question #) | 8-42 days                |
| Generally examined /looked at baby's body                                                    | 855                             | <input type="checkbox"/> | 856          | <input type="checkbox"/> | 857          | <input type="checkbox"/> |
| Weighed baby                                                                                 | 858                             | <input type="checkbox"/> | 859          | <input type="checkbox"/> | 860          | <input type="checkbox"/> |
| Checked cord                                                                                 | 861                             | <input type="checkbox"/> | 862          | <input type="checkbox"/> | 863          | <input type="checkbox"/> |
| Advised breastfeeding                                                                        | 864                             | <input type="checkbox"/> | 865          | <input type="checkbox"/> | 866          | <input type="checkbox"/> |
| Observed breastfeeding                                                                       | 867                             | <input type="checkbox"/> | 868          | <input type="checkbox"/> | 869          | <input type="checkbox"/> |
| Advised skin-to-skin contact/warmth                                                          | 870                             | <input type="checkbox"/> | 871          | <input type="checkbox"/> | 872          | <input type="checkbox"/> |
| Checked baby for danger signs (including sepsis)                                             | 873                             | <input type="checkbox"/> | 874          | <input type="checkbox"/> | 875          | <input type="checkbox"/> |
| Educated on danger signs                                                                     | 876                             | <input type="checkbox"/> | 877          | <input type="checkbox"/> | 878          | <input type="checkbox"/> |
| Referred to a health facility                                                                | 879                             | <input type="checkbox"/> | 880          | <input type="checkbox"/> | 881          | <input type="checkbox"/> |
| Provided information on washing hands before touching baby                                   | 882                             | <input type="checkbox"/> | 883          | <input type="checkbox"/> | 884          | <input type="checkbox"/> |
| Advised keeping the cord clean                                                               | 885                             | <input type="checkbox"/> | 886          | <input type="checkbox"/> | 887          | <input type="checkbox"/> |
| Advised not to bathe the baby within 24 hours after birth                                    | 888                             | <input type="checkbox"/> |              |                          |              |                          |

|     |                                                                                                                          |                                                                                                                     |                          |
|-----|--------------------------------------------------------------------------------------------------------------------------|---------------------------------------------------------------------------------------------------------------------|--------------------------|
| 889 | Can you tell us whether or not you were satisfied with the immediate newborn care?<br><b>Do not read list of options</b> | 1 = Yes was satisfied<br>2 = No was not satisfied (GO to 891)<br>3 = Neither satisfied nor dissatisfied (Go to 892) | <input type="checkbox"/> |
|-----|--------------------------------------------------------------------------------------------------------------------------|---------------------------------------------------------------------------------------------------------------------|--------------------------|



|     |                                                                                                                                                                                                             |                                                                   |       |
|-----|-------------------------------------------------------------------------------------------------------------------------------------------------------------------------------------------------------------|-------------------------------------------------------------------|-------|
| 890 | <b>IF YES</b> , then what was the level of satisfaction<br><b>Read both options</b>                                                                                                                         | 1 = Fully satisfied Go to 892<br>2 = Somewhat satisfied Go to 892 | _     |
| 891 | <b>IF NO</b> , then what was the level of dissatisfaction<br><b>Read both options</b>                                                                                                                       | 1 = Fully dissatisfied<br>2 = Somewhat dissatisfied               | _     |
| 892 | The last time you gave birth, did you keep your newborn at home for several days or weeks without taking the baby out?                                                                                      | 1 = Yes<br>2 = No – GO to 894                                     | _     |
| 893 | <b>IF YES</b> , what is the number of days that you kept your newborn in the house?                                                                                                                         | Enter number of days<br>Enter 999 if not known                    | _   _ |
| 894 | The last time you gave birth, how many days passed before you had visitors come to your house to see the baby? This includes visitors for any reason: health care workers, extended family, or friends.     | Enter number of days<br>Enter 999 if not known                    | _   _ |
| 895 | The last time you gave birth, how many days passed before someone other than you had physical contact with the baby? Physical contact means any kind of touching, even if the person did not hold the baby. | Enter number of days<br>Enter 999 if not known                    | _   _ |

|                                                                                                                                        |                                                                                                                                                                                                                                                             |                                                       |                                                                                                                                                                   |                                                                                                                                                                                       |                                                                                                                                                                                                                  |
|----------------------------------------------------------------------------------------------------------------------------------------|-------------------------------------------------------------------------------------------------------------------------------------------------------------------------------------------------------------------------------------------------------------|-------------------------------------------------------|-------------------------------------------------------------------------------------------------------------------------------------------------------------------|---------------------------------------------------------------------------------------------------------------------------------------------------------------------------------------|------------------------------------------------------------------------------------------------------------------------------------------------------------------------------------------------------------------|
| <b>9. Care of sick newborns</b>                                                                                                        |                                                                                                                                                                                                                                                             |                                                       |                                                                                                                                                                   |                                                                                                                                                                                       |                                                                                                                                                                                                                  |
| 900                                                                                                                                    | <p>Interviewer – stop to check: was the baby born after September 2004] Ethiopian calendar?</p> <p><b>If yes, continue with interview.</b></p> <p><b>If no, end interview at this point and continue with other women aged 13-49 in this household.</b></p> | <p>1 = Yes<br/>2 = No-End interview</p>               | _                                                                                                                                                                 |                                                                                                                                                                                       |                                                                                                                                                                                                                  |
| <b>Interviewer: Now I want to talk to you about any sickness [CHILD NAME] experienced in the first 28 days of life</b>                 |                                                                                                                                                                                                                                                             |                                                       |                                                                                                                                                                   |                                                                                                                                                                                       |                                                                                                                                                                                                                  |
| 901                                                                                                                                    | Has [CHILD NAME] ever been sick during first 28 days of life?                                                                                                                                                                                               | <p>1 = Yes<br/>2 = No</p>                             | _                                                                                                                                                                 |                                                                                                                                                                                       |                                                                                                                                                                                                                  |
| Can I just check, has [CHILD NAME] ever had any of the following symptoms during the first 28 days of life?                            |                                                                                                                                                                                                                                                             |                                                       |                                                                                                                                                                   |                                                                                                                                                                                       |                                                                                                                                                                                                                  |
| <b>Read list of symptoms out loud</b>                                                                                                  |                                                                                                                                                                                                                                                             |                                                       |                                                                                                                                                                   |                                                                                                                                                                                       |                                                                                                                                                                                                                  |
| <p>Enter 1 if Yes and continue along row</p> <p>Enter 2 if No and go to next symptom (row)</p> <p>If no symptoms, go to Section 10</p> | <p>Age at first episode</p> <p>Enter age in number of days</p>                                                                                                                                                                                              | <p>Was care sought for?</p> <p>1 = Yes<br/>2 = No</p> | <p>If YES, who did you seek care from?</p> <p>1 = Health post<br/>2 = Health centre<br/>3 = Hospital<br/>4 = HDA<br/>5 = Traditional Healers<br/>6 = Pharmacy</p> | <p>If care was sought, who cared for (CHILD NAME?)</p> <p>1 = HEW<br/>2 = Nurse<br/>3 = Health Officer<br/>4 = Pharmacist<br/>5 = Doctor<br/>6 = Traditional healer<br/>7 = Other</p> | <p>If care was not sought, why not?</p> <p>1 = Expected him/her to get better<br/>2 = Health facility too far<br/>3 = Cost of treatment too expensive<br/>4 = Don't trust the facility<br/>5 = Family member</p> |

|                             |     |                          |     |                          |     |                          |     |                          |     |                          |                                                                                |                          |
|-----------------------------|-----|--------------------------|-----|--------------------------|-----|--------------------------|-----|--------------------------|-----|--------------------------|--------------------------------------------------------------------------------|--------------------------|
|                             |     |                          |     |                          |     |                          |     |                          |     |                          | didn't allow<br>6 = Community<br>advisor<br>advised<br>against it<br>7 = Other |                          |
| Reduced feeding             | 902 | <input type="checkbox"/> | 903 | <input type="checkbox"/> | 904 | <input type="checkbox"/> | 905 | <input type="checkbox"/> | 906 | <input type="checkbox"/> | 907                                                                            | <input type="checkbox"/> |
| Child was underweight       | 908 | <input type="checkbox"/> | 909 | <input type="checkbox"/> | 910 | <input type="checkbox"/> | 911 | <input type="checkbox"/> | 912 | <input type="checkbox"/> | 913                                                                            | <input type="checkbox"/> |
| Difficult or fast breathing | 914 | <input type="checkbox"/> | 915 | <input type="checkbox"/> | 916 | <input type="checkbox"/> | 917 | <input type="checkbox"/> | 918 | <input type="checkbox"/> | 919                                                                            | <input type="checkbox"/> |
| Chest in-drawing            | 920 | <input type="checkbox"/> | 921 | <input type="checkbox"/> | 922 | <input type="checkbox"/> | 923 | <input type="checkbox"/> | 924 | <input type="checkbox"/> | 925                                                                            | <input type="checkbox"/> |
| Unusually hot or cold       | 926 | <input type="checkbox"/> | 927 | <input type="checkbox"/> | 928 | <input type="checkbox"/> | 929 | <input type="checkbox"/> | 930 | <input type="checkbox"/> | 931                                                                            | <input type="checkbox"/> |
| Less active than usual      | 932 | <input type="checkbox"/> | 933 | <input type="checkbox"/> | 934 | <input type="checkbox"/> | 935 | <input type="checkbox"/> | 936 | <input type="checkbox"/> | 937                                                                            | <input type="checkbox"/> |
| Yellow palms/soles/eyes     | 938 | <input type="checkbox"/> | 939 | <input type="checkbox"/> | 940 | <input type="checkbox"/> | 941 | <input type="checkbox"/> | 942 | <input type="checkbox"/> | 943                                                                            | <input type="checkbox"/> |
| Had diarrhea                | 944 | <input type="checkbox"/> | 945 | <input type="checkbox"/> | 946 | <input type="checkbox"/> | 947 | <input type="checkbox"/> | 948 | <input type="checkbox"/> | 949                                                                            | <input type="checkbox"/> |
| Convulsions                 | 950 | <input type="checkbox"/> | 951 | <input type="checkbox"/> | 952 | <input type="checkbox"/> | 953 | <input type="checkbox"/> | 954 | <input type="checkbox"/> | 955                                                                            | <input type="checkbox"/> |
| Skin pustules               | 956 | <input type="checkbox"/> | 957 | <input type="checkbox"/> | 958 | <input type="checkbox"/> | 959 | <input type="checkbox"/> | 960 | <input type="checkbox"/> | 961                                                                            | <input type="checkbox"/> |
| Cord red or draining puss   | 962 | <input type="checkbox"/> | 963 | <input type="checkbox"/> | 964 | <input type="checkbox"/> | 965 | <input type="checkbox"/> | 966 | <input type="checkbox"/> | 967                                                                            | <input type="checkbox"/> |
| Other (specify)             | 968 | <input type="checkbox"/> | 969 | <input type="checkbox"/> | 970 | <input type="checkbox"/> | 971 | <input type="checkbox"/> | 972 | <input type="checkbox"/> | 973                                                                            | <input type="checkbox"/> |
| Specify<br>_____            |     |                          |     |                          |     |                          |     |                          |     |                          |                                                                                |                          |

**Interviewer: fill in questions 974-983 only if in the above table the interviewee mentioned that care was sought out for any one of the symptoms mentioned**

|     |                                                                                                                                                          |                                                                                                                                                              |                      |
|-----|----------------------------------------------------------------------------------------------------------------------------------------------------------|--------------------------------------------------------------------------------------------------------------------------------------------------------------|----------------------|
| 974 | <b>If any of the above symptoms occurred</b><br>After how many days did you seek care the first time?                                                    | Write number of days from the onset of illness; if first day of illness, write 0; If possible use the medical record to confirm<br><br>99 if care not sought | <input type="text"/> |
| 975 | Was the [CHILD NAME] diagnosed with very severe disease by a health worker?<br><b>Interviewer: list the signs for very severe disease for the mother</b> | 1 = Yes<br>2 = No                                                                                                                                            | <input type="text"/> |
| 976 | Was [CHILD NAME] prescribed medicine for his/her illness?                                                                                                | 1 = Yes<br>2 = No                                                                                                                                            | <input type="text"/> |
| 977 | Did [CHILD NAME] receive 7 consecutive days of gentamycin injection?                                                                                     | 1 = Yes<br>2 = No                                                                                                                                            | <input type="text"/> |
| 978 | Did [CHILD NAME] receive 7 consecutive days of Amoxicillin?<br><br><b>Interviewer: explain Amoxicillin as an oral tablet that</b>                        | 1 = Yes<br>2 = No                                                                                                                                            | <input type="text"/> |

|     |                                                                                                                             |                                                                                                                            |                          |
|-----|-----------------------------------------------------------------------------------------------------------------------------|----------------------------------------------------------------------------------------------------------------------------|--------------------------|
|     | <b>is dissolved and taken as a liquid.</b>                                                                                  |                                                                                                                            |                          |
| 979 | At any time during the illness, did [CHILD NAME] take any drugs for the illness?                                            | 1 = Yes<br>2 = No                                                                                                          | <input type="checkbox"/> |
| 980 | Was [CHILD NAME] managed with expressed breast milk?                                                                        | 1 = Yes<br>2 = No                                                                                                          | <input type="checkbox"/> |
| 981 | Can you tell us whether or not you were satisfied with the care for the sick newborn?<br><b>Do not read list of options</b> | 1 = Yes was satisfied<br>2 = No was not satisfied (GO to 983)<br>3 = Neither satisfied nor dissatisfied (Go to Section 10) | <input type="checkbox"/> |
| 982 | <b>IF YES</b> , then what was the level of satisfaction<br><b>Read both options</b>                                         | 1 = Fully satisfied (Go to Section 10)<br>2 = Somewhat satisfied (Go to Section 10)                                        | <input type="checkbox"/> |
| 983 | <b>IF NO</b> , then what was the level of dissatisfaction<br><b>Read both options</b>                                       | 1 = Fully dissatisfied<br>2 = Somewhat dissatisfied                                                                        | <input type="checkbox"/> |

### Section 10. Children no longer alive (and died before reaching 28 days)

**Interviewer: if child is no longer alive and died before reaching 28 days, ask the following questions around symptoms, care-seeking, and cause of death**

*I understand that it is not easy to talk about children who have died and so please do let me know if you need time to answer the questions. This information is important and will allow the government can develop programs to improve children's health.*

|                                                                                                                |                          |                             |                          |
|----------------------------------------------------------------------------------------------------------------|--------------------------|-----------------------------|--------------------------|
| Which symptoms did you observe in (CHILD NAME'S) immediately before death?<br><br><b>Select all that apply</b> | For each: 1 = Yes 2 = No |                             |                          |
|                                                                                                                | 1000                     | Difficult or fast breathing | <input type="checkbox"/> |
|                                                                                                                | 1001                     | Chest in-drawing            | <input type="checkbox"/> |
|                                                                                                                | 1002                     | Unusually hot or cold       | <input type="checkbox"/> |
|                                                                                                                | 1003                     | Less active than usual      | <input type="checkbox"/> |
|                                                                                                                | 1004                     | Yellow palms/soles/eyes     | <input type="checkbox"/> |
|                                                                                                                | 1005                     | Had diarrhea                | <input type="checkbox"/> |
|                                                                                                                | 1006                     | Convulsions                 | <input type="checkbox"/> |
|                                                                                                                | 1007                     | Yellow palms/soles/eyes     | <input type="checkbox"/> |
|                                                                                                                | 1008                     | Skin pustules               | <input type="checkbox"/> |
|                                                                                                                | 1009                     | Cord red or draining puss   | <input type="checkbox"/> |
| 1010                                                                                                           | Other                    | <input type="checkbox"/>    |                          |
| 1011                                                                                                           | If OTHER, please specify |                             | Specify _____            |

|      |                                                                                                            |                                                                                                    |   |
|------|------------------------------------------------------------------------------------------------------------|----------------------------------------------------------------------------------------------------|---|
| 1012 | If CHILD NAME died due to an illness, was care sought for that illness?                                    | 1 = Yes<br>2 = No—go to end of questionnaire                                                       |   |
| 1013 | If yes, who provided that care?<br>Put <b>9</b> if not known                                               | 1 = HDA<br>2 = HEW<br>3 = Nurse<br>4 = Doctor<br>5 = Health Officer<br>6 = Pharmacist<br>7 = Other | _ |
| 1014 | If care was sought before [CHILD NAME] died, what was the cause of death diagnosed by the health providers | 1 = Pneumonia<br>2 = Diarrhea<br>3 = Severe infections<br>4 = Other (Specify)___                   |   |
| 1015 | If OTHER                                                                                                   | (Specify)_____                                                                                     |   |

**Interviewer: Please double check:**

1. Is there another woman aged 13-49 in this household who has not been interviewed?
2. Is there another woman in this household who has been pregnant between [DATE] and [DATE] and has not been interviewed?
- (3) Is there another woman in this household who has given birth between [DATE] and [DATE] and has not been interviewed?
- (4) Is there another woman with a newborn who has not been interviewed?

**If yes to any of them, please make sure you interview them**

**If No, end of interview – thank the participant for their time.**
