# Supplementary material for: Coverage of antenatal, intrapartum, and newborn care in 104 districts of Ethiopia: A before and after study four years after the launch of the national Community-Based Newborn Care programme
Source: PLOS journal article supplement (doi:10.1371/journal.pone.0251706), 2021-08-05
Supplement: S6 (10.1371/journal.pone.0251706.s006) [file journal.pone.0251706.s006]

S2 Table. Key components of the CBNC programme training for health extension workers

|                                                                                                                                                                                                                                                                                                                                                                                                                                                                                          |                                                                                                                                                                                                                                                                                                                                                                                                                        |
|------------------------------------------------------------------------------------------------------------------------------------------------------------------------------------------------------------------------------------------------------------------------------------------------------------------------------------------------------------------------------------------------------------------------------------------------------------------------------------------|------------------------------------------------------------------------------------------------------------------------------------------------------------------------------------------------------------------------------------------------------------------------------------------------------------------------------------------------------------------------------------------------------------------------|
| <b>1. Pregnancy identification and antenatal care</b> <ul style="list-style-type: none"> <li>- Introduction of pregnancy identification</li> <li>- Registering pregnant women and calculating expected due date</li> <li>- Focused antenatal care</li> <li>- Barriers to antenatal care</li> <li>- Home care during pregnancy</li> <li>- Use of Family Health Guide<sup>a</sup></li> </ul>                                                                                               | <b>2. Birth preparedness and complication readiness</b> <ul style="list-style-type: none"> <li>- Counselling skills for birth planning</li> <li>- Using Family Health Guide<sup>a</sup> for counselling</li> </ul>                                                                                                                                                                                                     |
| <b>3. Delivery</b> <ul style="list-style-type: none"> <li>- Safe and clean delivery</li> <li>- Promotion of skilled delivery</li> <li>- Barriers to skilled delivery</li> <li>- Danger signs during labour and delivery</li> </ul>                                                                                                                                                                                                                                                       | <b>4. Essential newborn care</b> <ul style="list-style-type: none"> <li>- Brief introduction of essential newborn care</li> <li>- Steps of immediate newborn care using a mannequin.</li> </ul>                                                                                                                                                                                                                        |
| <b>5. Postpartum care</b> <ul style="list-style-type: none"> <li>- Content and timing of postnatal care home visit</li> <li>- Hand washing, measuring temperature and weight and counselling skills during routine postnatal care home visit</li> <li>- Maternal danger signs in the postpartum period</li> <li>- Barriers to and solutions for postnatal care home visit</li> <li>- Practice filling out the Integrated Maternal and Child Care Card and family folder</li> </ul>       | <b>6. Management of the sick young infant</b> <ul style="list-style-type: none"> <li>- Management of birth asphyxia preterm and/or low birth weight babies</li> <li>- Assessment and classification of very severe disease, local bacterial infection, jaundice diarrhoea and HIV infection in young infants</li> </ul>                                                                                                |
| <b>7. Assessing young infants' weight and feeding</b> <ul style="list-style-type: none"> <li>- How to read a weight for age chart</li> <li>- How to check for feeding problems and assess breastfeeding</li> <li>- Signs of good attachment for breastfeeding</li> <li>- How to teach correct positioning and attachment for breastfeeding</li> <li>- Assessing young infants for underweight and feeding problems</li> <li>- Assessing young infants for immunization status</li> </ul> | <b>8. Identification, treatment and counselling of the mother and following up on sick young infants</b> <ul style="list-style-type: none"> <li>- Antenatal and postnatal care home visits</li> <li>- Actions to be taken to identify treatment</li> <li>- Steps of newborn resuscitation</li> <li>- Immunizing the sick young infant</li> <li>- Expressing and feeding the preterm infant with breast milk</li> </ul> |
| <b>9. When referral is not possible</b> <ul style="list-style-type: none"> <li>- Amoxicillin and gentamycin dosage</li> <li>- Calculating correct doses of amoxicillin and gentamycin</li> <li>- Demonstration of giving gentamycin injection</li> <li>- Practice of giving gentamycin injection</li> <li>- Counselling and negotiation skills during postnatal home visit to sick young infant</li> </ul>                                                                               | <b>10 Care of the sick young infant</b> <ul style="list-style-type: none"> <li>- Providing follow-up care to complete treatment for very severe disease</li> <li>- Negotiation skills with the caretaker</li> <li>- Filling out the young infant register</li> </ul>                                                                                                                                                   |

<sup>a</sup> Family health guide is low literacy pictorial tool for behaviour change communication
