# Supplementary material for: Coverage of antenatal, intrapartum, and newborn care in 104 districts of Ethiopia: A before and after study four years after the launch of the national Community-Based Newborn Care programme
Source: PLOS journal article supplement (doi:10.1371/journal.pone.0251706), 2021-08-05
Supplement: S7 (10.1371/journal.pone.0251706.s007) [file journal.pone.0251706.s007]

S3 Table. Antenatal care and institutional delivery for mothers who had a birth in the 3-15 months prior to the baseline (October –December 2013) and follow-up (November-December 2017) surveys.

|                                                     | OR                | P-value | AOR*<br>(95%CI)  | P-value |
|-----------------------------------------------------|-------------------|---------|------------------|---------|
| <b>1. Early identification of pregnancy</b>         |                   |         |                  |         |
| One or more antenatal care visit                    | 2.30 (1.78,3.0)   | <0.0001 | 2.25 (1.73,2.92) | <0.0001 |
| Informed woman development army leader of pregnancy | 0.74 (0.34,1.62)  | 0.46    | 0.61 (0.28,1.31) | 0.20    |
| <b>2. Provision of focused antenatal care</b>       |                   |         |                  |         |
| 4 or more antenatal care visits                     | 2.03 (1.67,2.48)  | <0.0001 | 2.01 (1.64,2.48) | <0.0001 |
| <i>Among those having any antenatal care visit</i>  |                   |         |                  |         |
| First antenatal care visit at a health centre       | 1.22 (0.95,1.57)  | 0.12    | 1.23 (0.95,1.59) | 0.12    |
| Advised on birth preparedness plan                  | 0.76 (0.60,0.97)  | 0.03    | 0.76 (0.60,0.98) | 0.03    |
| Informed about pregnancy danger signs               | 0.87 (0.68,1.11)  | 0.25    | 0.89 (0.69,1.14) | 0.35    |
| Informed about breastfeeding                        | 1.07 (0.83,1.39)  | 0.58    | 1.15 (0.88,1.49) | 0.30    |
| Received information on nutrition                   | 0.62 (0.49,0.80)  | <0.001  | 0.65 (0.50,0.85) | <0.001  |
| Weight measured                                     | 1.00 (0.74,1.35)  | 0.99    | 1.01 (0.75,1.37) | 0.92    |
| Height measured                                     | 1.15 (1.04,1.26)  | 0.09    | 1.15 (1.04,1.27) | 0.01    |
| Blood pressure measured                             | 0.84 (0.65, 1.07) | 0.16    | 0.84 (0.66,1.08) | 0.18    |
| Gave urine sample for a test                        | 2.04 (1.57,2.65)  | <0.0001 | 2.06 (1.58,2.69) | <0.0001 |
| Gave blood sample for syphilis test                 | 1.62 (1.21,2.17)  | <0.0001 | 1.65 (1.21,2.25) | <0.0001 |
| Received iron folate tablets or iron syrup          | 1.52 (1.17,1.99)  | <0.01   | 1.54 (1.17,2.01) | <0.01   |
| Received HIV testing                                | 0.44 (0.34,0.56)  | <0.0001 | 0.43 (0.33,0.55) | <0.0001 |
| <b>3. Promotion of institutional delivery</b>       |                   |         |                  |         |
| Hospital or health centre delivery                  | 5.62 (4.47,7.09)  | <0.0001 | 5.52 (4.34,7.01) | <0.0001 |

\* Adjusted for maternal age and education.
